# Supplementary material for: Exceptional stability of a perilipin on lipid droplets depends on its polar residues, suggesting multimeric assembly
Source: eLife journal article supplement (doi:10.7554/elife.61401), 2021-04-15
Supplement: supp [file elife-61401-supp-v1.zip]

Figure 1 - Supplement 1

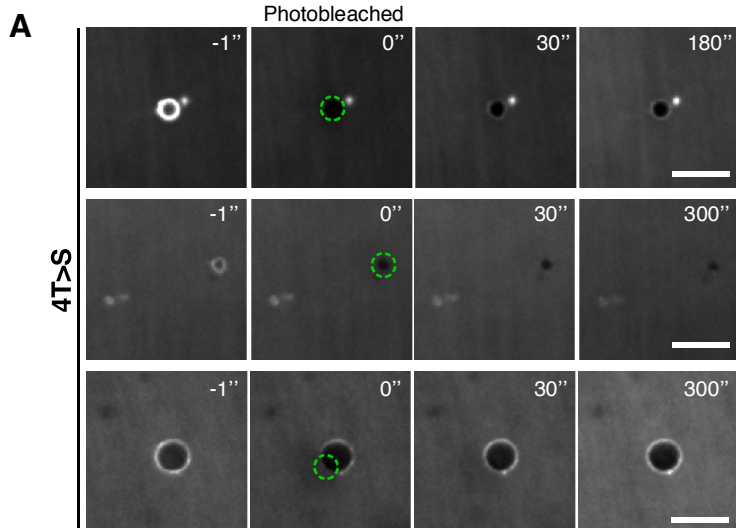

**B**

| Protein     | # Total FRAPs | # Recovery:<br>Total FRAP | # Partial FRAPs | # Recovery:<br>Partial FRAP |
|-------------|---------------|---------------------------|-----------------|-----------------------------|
| Plin4 12mer | 15            | 0                         | 6               | 0                           |
| Plin4 4mer  | 13            | 0                         | 8               | 0                           |
| 4T>S        | 8             | 2                         | 5               | 4                           |
