# Supplementary material for: Exceptional stability of a perilipin on lipid droplets depends on its polar residues, suggesting multimeric assembly
Source: eLife journal article supplement (doi:10.7554/elife.61401), 2021-04-15
Supplement: supp [file elife-61401-supp-v1.zip]

Archive with 20 entries (20 files):
- elife_poa_e61401_Figure_1_figure_supplement_1.pdf
- elife_poa_e61401_Figure_2_figure_suplement_1.png
- elife_poa_e61401_Figure_2_figure_supplement_2.png
- elife_poa_e61401_Figure_3_figure_supplement_1.pdf
- elife_poa_e61401_Figure_4_figure_supplement_1.pdf
- elife_poa_e61401_Figure_5_figure_supplement_1.pdf
- elife_poa_e61401_Figure_6_figure_supplement_1.pdf
- elife_poa_e61401_Figure_6_figure_supplement_2.pdf
- elife_poa_e61401_Video_1.avi
- elife_poa_e61401_Video_2.avi
- elife_poa_e61401_Video_3.avi
- elife_poa_e61401_Video_4.avi
- elife_poa_e61401_Supplementary_file_1.xlsx
- elife_poa_e61401_Figure_3_source_data_1.xlsx
- elife_poa_e61401_Figure_4_source_data_1.xlsx
- elife_poa_e61401_Figure_5_source_data_1.xlsx
- elife_poa_e61401_Figure_6_source_data_1.xlsx
- elife_poa_e61401_Figure_7_source_data_1.xlsx
- elife_poa_e61401_Figure_8_source_data_1.xlsx
- elife_poa_e61401_Transparent_Reporting_File.docx
