# Supplementary material for: Exceptional stability of a perilipin on lipid droplets depends on its polar residues, suggesting multimeric assembly
Source: eLife journal article supplement (doi:10.7554/elife.61401), 2021-04-15
Supplement: supp [file elife-61401-supp-v1.zip › elife_poa_e61401_Figure_3_source_data_1.xlsx]

## Sheet: Fig. 3 D
Date 20190505
	WT (ERG6-RFP)			pet10D			pet10D + OA
	n	LDs	%	n	LDs	%	n	LDs	%		# Image	number of images quantified
Empty-GFP	107	0	0	73	0	0	190	0	0		n	number of yeast quantified in total
P4 4mer	89	0	0	87	0	0	38	23	60.5263		LDs	number of yeast positive for LD signal
P4 6mer	70	11	15.7143	71	36	50.7042	70	65	92.8571
P4 12mer	73	71	97.2603	92	92	100	102	93	91.1765
Plin1AH	59	21	35.5932	118	65	55.0847	18	10	55.5556
Plin2AH	82	0	0	91	11	12.0879	40	30	75
Plin3 87-205	112	0	0	74	0	0	35	15	42.8571

## Sheet: Fig 3D (repeat)
Assay 20190505
	PET10 (WT)			pet10D			pet10D + OA
	n	LDs	%	n	LDs	%	n	LDs	%		# Image	number of images quantified
Empty-GFP	107	0	0	73	0	0	190	0	0		n	number of yeast quantified in total
P4 4mer	89	0	0	87	0	0	38	23	60.5263		LDs	number of yeast positive for LD signal
P4 6mer	70	11	15.7143	71	36	50.7042	70	65	92.8571
P4 12mer	73	71	97.2603	92	92	100	102	93	91.1765
Plin1AH	59	21	35.5932	118	65	55.0847	18	10	55.5556
Plin2AH	82	0	0	91	11	12.0879	40	30	75
Plin3 87-205	112	0	0	74	0	0	35	15	42.8571

## Sheet: Fig. 3 E
Summary of the LD size quantification in pet10D + OA expressing the different proteins
										Date 20190505						Date 20180829				Date 20180216					Date 20180207
	Summary of experiments done in which date
	Date	Plin4 12mer	Plin4 6mer	Plin1 AH	Plin2 AH	Plin3 AH				20190505	Plin4 12mer	Plin4 6mer	Plin 2 AH	Plin3 AH		20180829	Plin4 12mer	Plin4 6mer		20180216	Plin4 12mer	Plin1 AH	Plin3 AH		20180207	Plin4 12mer	Plin1 AH	Plin2 AH
	20190505	x	x		x	x				n cells	55	42	51	53		n Cells	42	50		n Cells	54	55	52		n cells	54	53	57
	20180829	x	x							n LDs	93	101	99	95		n LDs	159	148		n LDs	137	141	136		n LDs	148	142	143
	20180216	x		x		x				Median LD size (pixels)	32	37	69	52		Median LD size (pixels)	32	37		Median LD size (pixels)	37	69	69		Median LD size (pixels)	37	69	80
	20180207	x		x	x
										In %						In %				in %					in %
											Plin4 12mer	Plin4 6mer	Plin2 AH	Plin3 AH			Plin4 12mer	Plin4 6mer			Plin4 12mer	Plin AH	Plin3 AH			Plin4 12mer	Plin1 AH	Plin2 AH
	Summary of n of cells and # of LDs quantified									LD area (pixels)	Frequency	Frequency	Frequency	Frequency		LD area (pixels)	Frequency	Frequency		LD area (pixels)	Frequency	Frequency	Frequency		LD area (pixels)	Frequency	Frequency	Frequency
	Every condition was tested at least twice, and with a n of cells higher than 42, and more than 90 LDs.									0-20	11.828	4.9505	0	0		0-20	6.28931	4.72973		0-20	6.61765	0.735294	0		0-20	0	0	0
										21-40	78.4946	68.3168	16.1616	34.7368		21-40	80.5031	58.1081		21-40	53.6765	16.1765	18.797		21-40	58.7838	16.1972	8.39161
										41-60	4.30108	18.8119	15.1515	27.3684		41-60	7.54717	20.2703		41-60	15.4412	18.3824	15.7895		41-60	19.5946	15.493	20.2797
										61-80	5.37634	7.92079	50.5051	31.5789		61-80	5.66038	15.5405		61-80	16.9118	45.5882	39.0977		61-80	16.2162	40.1408	41.2587
										81-100	0	0	15.1515	5.26316		81-100	0	1.35135		81-100	5.14706	12.5	16.5414		81-100	2.02703	18.3099	16.0839
										101-120	0	0	3.0303	1.05263		101-120	0	0		101-120	0.735294	4.41176	6.76692		101-120	2.02703	7.04225	7.69231
										121-140	0	0	0	0		121-140	0	0		121-140	1.47059	2.20588	3.00752		121-140	1.35135	2.11268	4.8951
										140<	0	0	0	0		140<	0	0		140<	0	0	0		140<	0	0.7	1.4
											100	100	100	100			100	100			100	100	100			100	99.9958	100.001
