# Supplementary material for: Exceptional stability of a perilipin on lipid droplets depends on its polar residues, suggesting multimeric assembly
Source: eLife journal article supplement (doi:10.7554/elife.61401), 2021-04-15
Supplement: supp [file elife-61401-supp-v1.zip › elife_poa_e61401_Figure_4_source_data_1.xlsx]

## Sheet: Fig. 4 A
	Plin4 12mer 20200212			Plin1 AH 20200212			Plin2 AH 20201001			Plin3 AH 20201001
	Mean	SD	n	Mean	SD	n	Mean	SD	n	Mean	SD	n
-6	1.004	0.04	24	0.981	0.043	29	0.999143	0.0371625	14	0.99	0.023	16
-5	1.002	0.039	24	0.996	0.039	29	1.00357	0.0411857	14	1.002	0.024	16
-4	0.998	0.044	24	1.01	0.026	29	0.997857	0.0305459	14	0.995	0.03	16
-3	0.997	0.025	24	1.005	0.042	29	0.990786	0.0295952	14	1	0.028	16
-2	1	0.041	24	1.008	0.028	29	1.00857	0.0346537	14	1.008	0.024	16
-1	0.999	0.045	24	1	0.031	29	0.998857	0.0301327	14	1.007	0.051	16
0	0.187	0.056	24	0.28	0.078	29	0.399214	0.107147	14	0.475	0.103	16
1	0.206	0.055	24	0.349	0.082	29	0.652714	0.180463	14	0.773	0.118	16
2	0.212	0.062	24	0.389	0.091	29	0.743643	0.166079	14	0.856	0.115	16
3	0.21	0.064	24	0.419	0.102	29	0.815714	0.166387	14	0.911	0.086	16
4	0.208	0.06	24	0.465	0.128	29	0.867	0.140094	14	0.921	0.075	16
5	0.208	0.061	24	0.485	0.138	29	0.871786	0.115352	14	0.925	0.059	16
6	0.209	0.065	24	0.506	0.141	29	0.915714	0.12867	14	0.92	0.077	16
7	0.212	0.064	24	0.523	0.147	29	0.929286	0.119134	14	0.945	0.037	16
8	0.212	0.057	24	0.541	0.156	29	0.946	0.120298	14	0.942	0.035	16
9	0.207	0.053	24	0.568	0.175	29	0.938429	0.132562	14	0.96	0.049	16
10	0.214	0.064	24	0.582	0.189	29	0.935714	0.114984	14	0.961	0.051	16
11	0.212	0.052	24	0.598	0.19	29	0.958143	0.120268	14	0.981	0.052	16
12	0.213	0.062	24	0.606	0.186	29	0.9545	0.118306	14	0.959	0.044	16
13	0.211	0.061	24	0.632	0.187	29	0.988929	0.127522	14	0.978	0.043	16
14	0.211	0.063	24	0.632	0.187	29	0.969071	0.139403	14	0.978	0.046	16
15	0.214	0.065	24	0.644	0.186	29	0.960071	0.119249	14	0.954	0.044	16
20	0.225	0.068	24	0.695	0.196	29	0.962929	0.0969389	14	0.942	0.053	16
25	0.226	0.066	24	0.709	0.188	29	1.00464	0.0899124	14	0.945	0.059	16
30	0.229	0.071	24	0.749	0.196	29	0.966286	0.0685323	14	0.953	0.048	16
35	0.224	0.069	24	0.764	0.198	29	0.975357	0.108052	14	0.959	0.034	16
40	0.221	0.068	24	0.77	0.187	29	0.973	0.105293	14	0.984	0.044	16
45	0.218	0.065	24	0.779	0.191	29	0.961	0.0655756	14	0.966	0.064	16
50	0.219	0.069	24	0.813	0.181	29	0.960214	0.0889764	14	0.96	0.047	16
55	0.223	0.067	24	0.815	0.18	29	0.9845	0.127863	14	0.951	0.061	16
60	0.218	0.062	24	0.826	0.198	29	0.956214	0.0790493	14	0.971	0.063	16
65	0.219	0.066	24	0.843	0.175	29	0.964929	0.104387	14	0.963	0.072	16
70	0.217	0.064	24	0.841	0.198	29	0.959929	0.0836931	14	0.969	0.055	16
75	0.23	0.072	24	0.844	0.194	29	0.970214	0.0872998	14	0.96	0.083	16
95	0.223	0.063	24	0.837	0.181	29	0.978071	0.121483	14	0.967	0.067	16
115	0.223	0.071	24	0.854	0.159	29	0.963643	0.0912845	14	0.981	0.065	16
135	0.218	0.072	24	0.879	0.154	29	0.9525	0.106598	14	0.98	0.06	16
155	0.22	0.076	24	0.89	0.161	29	0.941	0.0900854	14	0.97	0.076	16
175	0.22	0.077	24	0.891	0.138	29	0.9485	0.100276	14	0.96	0.072	16
195	0.219	0.076	24	0.922	0.141	29	0.939643	0.106868	14	0.956	0.083	16

## Sheet: Fig. 4 B
Plin4-3x in pet10 cells FRAP LD, log phase
2007-12-07
	Plin1-LD-mean(11)						Plin4-12mer_LD (N=5)
t [sec]	N=11					t corr [s]	mean 06-08
-2.646	Plin1-LD-mean(11)	SD				-2.58	1.0012	0.0253614
-2.075	0.996182	0.0451128				-2.1	1.0018	0.0126372
-1.525	0.994455	0.0299512				-1.57	1.0028	0.0164833
-0.978	1.01364	0.0146988				-1.01	0.992	0.0214009
-0.433	0.993818	0.0233402				-0.44	1.0022	0.0242219
0	1.00318	0.0529732				0	0.1828	0.0305647
1.096	0.355273	0.0715166				1.02	0.1984	0.029955
2.139	0.455636	0.0693459				2.03	0.2098	0.0266496
3.153	0.506909	0.0853234				3.05	0.209	0.0285657
4.166	0.555	0.0698269				4.06	0.2134	0.0414343
5.181	0.591	0.086267				5.08	0.2206	0.0458508
6.194	0.624273	0.0842272				6.09	0.2296	0.0454126
7.207	0.630545	0.0912429				7.12	0.2334	0.0324238
8.223	0.663909	0.0967197				8.14	0.238	0.0218518
9.237	0.696636	0.0996838				9.13	0.2366	0.0280767
10.253	0.703636	0.0900958				10.15	0.2426	0.0306072
11.276	0.710545	0.0921763				15.17	0.2338	0.0240458
12.278	0.732364	0.105027				20.22	0.2582	0.04658
13.291	0.762273	0.106301				25.22	0.264	0.0464004
14.306	0.769	0.121928				30.22	0.2502	0.0319327
15.32	0.784455	0.129729				35.22	0.2654	0.0495207
16.333	0.768091	0.111708				40.32	0.2688	0.0546324
17.348	0.811636	0.118184				45.32	0.27	0.0595441
18.361	0.825818	0.132534				50.32	0.2714	0.0502872
19.376	0.807545	0.0963165				55.32	0.2924	0.0618611
20.391	0.848455	0.130238				60.42	0.2926	0.0562788
21.404	0.851182	0.133801				65.42	0.3	0.0607042
22.438	0.839182	0.115136				85.42	0.3312	0.0821139
23.432	0.853182	0.0883978				105.42	0.2898	0.0659333
24.47	0.837273	0.0823494				125.42	0.3142	0.0803474
25.471	0.862545	0.0794674				145.42	0.3322	0.101544
26.475	0.832091	0.0641599				165.42	0.3458	0.102366
27.488	0.816	0.0518922				185.42	0.4112	0.219202
28.504	0.845636	0.0906733				205.42	0.4074	0.18261
29.517	0.804	0.0725383				225.42	0.3916	0.135852
30.531	0.816182	0.0834024				245.42	0.3998	0.119688
35.622	0.800636	0.0786578				265.42	0.3538	0.092012
40.628	0.834455	0.0787685				285.42	0.429	0.135766
45.654	0.858091	0.0789056				305.42	0.4044	0.0990848
50.67	0.869091	0.107387				325.42	0.3686	0.0626762
55.699	0.852091	0.10002				345.42	0.3816	0.0695219
60.712	0.880273	0.109682
65.77	0.891636	0.162035
70.598	0.864727	0.0934239
75.608	0.866545	0.0821199
80.651	0.847727	0.100785
85.654	0.820091	0.141056
105.762	0.821	0.163095
125.859	0.896364	0.159879
145.934	0.934	0.10797
165.938	0.9075	0.140078
186.02	0.900375	0.124188
206.036	0.857375	0.103424
226.042	0.855625	0.117918
	0.830125	0.0730547

## Sheet: Fig. 4 C
		Plin4 12mer		Plin1 AH		20201030
	Timelapse (s)	Mean	SteDev	Mean	SteDev
	-6	1.00657	0.0198526	0.907071	0.263701
	-5	1.00864	0.0223662	0.924643	0.267319
	-4	0.996929	0.0136295	0.936357	0.271053
	-3	0.996429	0.0159215	0.935643	0.270278
	-2	0.996	0.0114556	0.938	0.271609
	-1	0.994286	0.0183782	0.931357	0.269865
	0	0.2105	0.229408	0.282429	0.0891116
	1	0.220286	0.227604	0.468214	0.165512
	2	0.224714	0.22623	0.569714	0.196878
	3	0.229286	0.224812	0.6325	0.218153
	4	0.230071	0.224333	0.678929	0.234892
	5	0.230071	0.224424	0.732786	0.238679
	6	0.234714	0.222967	0.755571	0.240732
	7	0.239714	0.221288	0.758	0.23872
	8	0.235571	0.222233	0.791714	0.25398
	9	0.233143	0.22454	0.810714	0.250283
	10	0.2345	0.223242	0.829643	0.256813
	11	0.238786	0.222583	0.840214	0.255099
	12	0.241714	0.221043	0.830929	0.25136
	13	0.245643	0.22145	0.819286	0.252418
	14	0.248357	0.218887	0.814643	0.253076
	15	0.251357	0.218416	0.823143	0.256419
	20	0.265	0.215152	0.868643	0.262127
	25	0.271786	0.211665	0.885643	0.266604
	30	0.281857	0.210602	0.8905	0.260384
	35	0.284929	0.208668	0.902	0.264996
	40	0.295214	0.207031	0.914857	0.269747
	45	0.299	0.205589	0.900786	0.266643
	50	0.305929	0.20479	0.900786	0.262779
	55	0.313643	0.201559	0.906643	0.26912
	60	0.331	0.195831	0.896357	0.262007
	65	0.333214	0.19475	0.9435	0.282212
	70	0.336214	0.195604	0.923357	0.271501
	75	0.355571	0.190574	0.908286	0.266802
	95	0.3565	0.189058	0.899714	0.266748
	115	0.374	0.183558	0.934929	0.278535
	135	0.398786	0.180205	0.922286	0.279117
	155	0.409714	0.179782	0.951571	0.288665
	175	0.4335	0.171805	0.939286	0.278351
	195	0.454071	0.164742	0.906071	0.27155
		Prot	N. of Images	N. of ROIs	Half time	Fr. Mobile	Fr. Immobile
		P4 12mer	3	15	97.6	0.52	0.48	Take into account that Plin4 did not reach
		Plin1 AH	3	14	3.32	0.9	0.1	the plateau, so this numbers are just orientatory

## Sheet: Fig. 4 D
Exp 20171215 FRAP of Plin4-6mer / 8mer / 12mer in exp phase WT cells (ERG6-RFP)
t (s)	6mer PM N=12	6mer st dev	8mer PM N=7	st dev	12mer PM N=7	st dev
-2.668	1.00125	0.0241553	1.00229	0.0143842	1.00329	0.0116149
-2.129	0.999583	0.0211894	1.003	0.0180831	1.00386	0.021836
-1.567	0.99925	0.0147902	1.009	0.0237978	1.00986	0.0172185
-0.992	1.00225	0.0210503	0.995857	0.00802971	0.981857	0.0211142
-0.444	0.9975	0.0285991	0.989714	0.0210453	1.001	0.017195
0	0.332083	0.0538575	0.253571	0.0542797	0.286286	0.0562693
2.06	0.396667	0.0568944	0.286714	0.0447575	0.318143	0.0584592
4.119	0.387833	0.0432894	0.299714	0.0456827	0.326857	0.0703833
6.217	0.414	0.0413543	0.292429	0.0513318	0.328714	0.0597236
8.25	0.42225	0.0587694	0.314286	0.0476015	0.330857	0.0637689
10.277	0.436917	0.0524707	0.328714	0.0381301	0.325286	0.0569436
12.303	0.447833	0.0642521	0.328286	0.041552	0.331286	0.0718232
14.394	0.471167	0.0702112	0.328	0.0475605	0.336429	0.0720991
16.417	0.4715	0.0566272	0.331857	0.0450312	0.349286	0.073828
18.464	0.483417	0.0604355	0.347	0.0423005	0.340286	0.071423
20.479	0.484833	0.061237	0.361286	0.0438243	0.340857	0.0690759
22.511	0.504167	0.0739101	0.360714	0.0540176	0.338143	0.0734743
24.526	0.50725	0.0753442	0.365	0.0456362	0.340429	0.0679163
26.573	0.507333	0.0733762	0.364857	0.0441378	0.362143	0.0751741
28.639	0.522333	0.0843007	0.378	0.0493592	0.351714	0.071416
	0.53425	0.0787298	0.379571	0.0583205	0.354714	0.0817918
35.732	0.547333	0.0844278	0.405286	0.0482449	0.360571	0.0721107
40.762	0.556583	0.0873472	0.403571	0.0597686	0.373286	0.0799619
45.765	0.590583	0.0887698	0.426714	0.0572588	0.368714	0.0744126
50.773	0.605083	0.108981	0.432857	0.0586811	0.366429	0.0707834
55.791	0.61625	0.124539	0.447	0.0567627	0.360143	0.0709258
60.812	0.6255	0.13081	0.450857	0.0494956	0.370857	0.0872056
65.859	0.642167	0.130861	0.468143	0.0493944	0.386857	0.0970265
70.886	0.624167	0.117949	0.471571	0.0595395	0.388714	0.097118
75.911	0.63725	0.130079	0.489429	0.0524241	0.396857	0.099095
80.938	0.65625	0.109874	0.475571	0.0722216	0.397	0.100316
85.984	0.6615	0.117025	0.496714	0.0702109	0.397143	0.111389
91.064	0.669583	0.105525	0.513143	0.0519051	0.408429	0.0976914
96.127	0.667	0.107525	0.507429	0.0724243	0.426429	0.111587
116.18	0.707083	0.117669	0.55	0.0690845	0.426143	0.117393
136.208	0.735333	0.148381	0.563571	0.0796343	0.445714	0.141835
156.278	0.769333	0.157812	0.593857	0.0800946	0.468286	0.145697
176.313	0.760167	0.131176	0.609286	0.0860692	0.491857	0.178214
196.319	0.776833	0.126952	0.645286	0.065969	0.513429	0.186634
216.382	0.808	0.121714	0.635714	0.0883227	0.536286	0.224732
236.4	0.83125	0.121046	0.650143	0.072921	0.552714	0.229856
256.426	0.815167	0.118752	0.675429	0.0572418	0.566143	0.233363
276.433	0.829083	0.107898	0.714286	0.0750616	0.573429	0.255428
296.452	0.803875	0.123671	0.691429	0.0842553	0.581286	0.274996
316.453			0.712286	0.108029	0.521333	0.0604842
