# Supplementary material for: Exceptional stability of a perilipin on lipid droplets depends on its polar residues, suggesting multimeric assembly
Source: eLife journal article supplement (doi:10.7554/elife.61401), 2021-04-15
Supplement: supp [file elife-61401-supp-v1.zip › elife_poa_e61401_Figure_5_source_data_1.xlsx]

## Sheet: Fig. 5D
Date	Protein	Prep	[ ] mg/ml	No oil sample?	Abs?	Band?	Quantification (% of total prot)
20180808	P4 4mer	Oct-15 Bruno's	0.5	Yes		Yes	8.9	8.9
20181206	P4 4mer	20181128	0.5	Yes	0.204	Yes	3.1	3.1
20190723	P4 4mer	20181005	0.5	No	0.073	Yes	3.5	3.5
20190918	P4 4mer	20181128 DTT	0.5	No	0.47	Yes	7.5	7.5
20190918	P4 4mer	20181128 DTT	0.5	No	0.383	Yes	8	8
20180808	P4m5T	20170921	0.5	Yes		No	-	0
20180817	P4m5T	20180816 B5	0.5	Yes		No	-	0
20180823	P4m5T	20180816	0.5	Yes		No	-	0
20180903	P4m5T	20180816	1	Yes	0.577	No	-	0
20181206	P4m5T	20181203	0.5	No		No	-	0
20190228	P4m5T	20180816	0.5	No	0.04	No	-	0
20190723	P4m5T	20180816	0.5	No	0.015	No	-	0
20170128	P4wt3x	20170106	1	Yes		Yes	5.3	5.3
20170131	P4wt3x	20170106	1	Yes		Yes	10.6	10.6
20170202	P4wt3x	20170106	1	Yes		Yes	6.2	6.2
20181026	P4wt3x	20170107	1	Yes	0.88	Yes	6.79	6.79
20181206	P4wt3x	20170301-P2	0.5	No	0.18	yes	1.9	1.9
20190228	P4wt3x	20170301-P2	0.5	No	0.163	yes	8.38	8.38
20190723	P4wt3x	20170301-P1	0.5	No	0.152	Yes	3.9	3.9
20190918	P4wt3x	20170107	0.5	No	0.46	Yes	3.9	3.9
20180823	Plin3AH	20180821	0.5	Yes		Yes	Very faint-0	0
20180903	Plin3AH	20180821	1	Yes	1.777	Yes	2.2	2.2
20181024	Plin3AH	20180821	1	Yes	0.347	Yes	1.85	1.85
20190723	Plin3AH	20180821	0.5	No	0.112	Yes	2.9	2.9
	Average	StdDev	n
P4wt3x	5.87125	2.76395	8
P4m5T	0	0	7
Plin3AH	1.7375	1.23786	4
P4 4mer	6.2	2.69815	5
																						.
n is the number of times that I repeated the assay with that protein.																						3

## Sheet: Fig. 5F
Quantification of 20190924 experiment. Prominence for maxima detection: 150 for all of them
All the conditions have 4 images quantified but P4 4mer 120min that has 8, and P4M14KD 10min that has 3
Plin3AH 24h after not determined because of too much clustering.
	Before			10min after			120min after			24h after			Revortexed
	per 1000 um^2	per 1000 um^2		per 1000 um^2	per 1000 um^2		per 1000 um^2	per 1000 um^2		per 1000 um^2	per 1000 um^2		per 1000 um^2	per 1000 um^2
Prot	Mean	StdDev	SUM (n)	Mean	StdDev	SUM (n)	Mean	StdDev	SUM (n)	Mean	StdDev	SUM (n)	Mean	StdDev	SUM (n)
P4 12mer	0	0	0	3.77374	1.86985	110	2.47008	1.26269	72	3.12191	1.9224	91	171.156	67.8699	4989
P4 4mer	0	0	0	11.2869	4.5532	329	87.4993	92.0008	5101	139.651	110.234	3775	580.847	126.25	16931
P4 M14KD	0	0	0	291.561	189.339	6374	271.16	98.0504	7904	332.501	183.463	9692	517.86	141.455	15095
Plin3AH	0.0343067	0.0686135	1	526.574	293.823	15349	629.357	175.935	18345	-	-	-	711.179	16.6422	20730
In % of fluorescent particles (taking 100% the revortexed sample of that protein).
	Before			10min after			120min after			24h after			Revortexed
	% fluorescent particles			% fluorescent particles			% fluorescent particles			% fluorescent particles			% fluorescent particles
Prot	Mean	StdDev	SUM (n)	Mean	StdDev	SUM (n)	Mean	StdDev	SUM (n)	Mean	StdDev	SUM (n)	Mean	StdDev	SUM (n)
P4 12mer	0	0	0	2.20485	1.09248	110	1.44317	0.737739	72	1.82401	1.12319	91	100	39.6538	4989
P4 4mer	0	0	0	1.94318		329	15.0641	15.8391	5101	24.0427	18.9781	3775	100	21.7355	16931
P4 M14KD	0	0	0	56.3012	36.5618	6374	52.3617	18.9338	7904	64.2067	35.4271	9692	100	27.3153	15095
Plin3AH	0.00482393	0.00964785	1	74.0425	41.315	15349	88.4949	24.7385	18345	-	-	-	100	2.34009	20730
		P4 12mer		P4 4mer		P4 M14KD		Plin3AH
		Mean	StdDev	Mean	StdDev	Mean	StdDev	Mean	StdDev
0.9	Before	0	0	0	0	0	0	0.00482393	0.00964785
10	10min after	2.20485	1.09248	1.94318	0	56.3012	36.5618	74.0425	41.315
120	120min after	1.44317	0.737739	15.0641	15.8391	52.3617	18.9338	88.4949	24.7385
1440	24h after	1.82401	1.12319	24.0427	18.9781	64.2067	35.4271
10000	Revortexed	100	39.6538	100	21.7355	100	27.3153	100	2.34009

## Sheet: Fig. 5F -- 2nd assay
Quantification of 20190909 experiment. Prominence for maxima detection: 150 for all of them, but for Plin3 revortexed (There I did 30 prominence, because the exposure time was 10 times less (25ms instead 250ms), so I also applied a lower prominence to have all the possible signal)
Quantifications done in 800x800 pixels, that is 72,8 x 72,8 microns.
Plin3AH 120min not quantified because there was too much clustering. P4 4mer 10min was not quantiifed because the images seemed with too much background coming from the cristal surfaces or the sample preparation.
	Before				10min after				120min after				Revortexed
	per 1000 um^2	per 1000 um^2			per 1000 um^2	per 1000 um^2			per 1000 um^2	per 1000 um^2			per 1000 um^2	per 1000 um^2		# Images
Prot	Mean	StdDev	SUM (n)	# Images	Mean	StdDev	SUM (n)	# Images	Mean	StdDev	SUM (n)	# Images	Mean	StdDev	SUM (n)
P4 12mer	0	0	0	5	578	310.72	2312	4	423.4	282.19	2117	5	3293.5	842.16	13174	4
P4 4mer	1	2.23	5	5	Not good images - Too much background				1904.75	1666.84	7619	4	618.75	289.29	2475	4
P4 M14KD	0	0	0	5	2855.83	1160.07	17135	6	3632.66	1798.83	21796	6	4230.33	1213.77	12691	3
Plin3AH	0	0	0	4	3818.2	2268.03	19091	5	droplests clustered				4804.25	2408.03	19217	4
In % of fluorescent particles (taking 100% the revortexed sample of that protein).
	Before			10min after			120min after			Revortexed
	% fluorescent particles			% fluorescent particles			% fluorescent particles			% fluorescent particles
Prot	Mean	StdDev	SUM (n)	Mean	StdDev	SUM (n)	Mean	StdDev	SUM (n)	Mean	StdDev	SUM (n)
P4 12mer	0	0		17.5497	9.43434		12.8556	8.56809		100	25.5704
P4 4mer	0.161616	0.360404		#VALUE!	-		307.838	269.388		100	46.7539
P4 M14KD	0	0		67.5084	27.4227		85.8718	42.5222		100	28.6921
Plin3AH	0	0		79.4755	47.2088		-	-		100	50.1229
		P4 12mer		P4 4mer		P4 M14KD		Plin3AH
To have them good in the x axes		Mean	StdDev	Mean	StdDev	Mean	StdDev	Mean	StdDev
0.9	Before	0	0	0.161616	0.360404	0	0	0	0
10	10min after	17.5497	9.43434			67.5084	27.4227	79.4755	47.2088
120	120min after	12.8556	8.56809	307.838	269.388	85.8718	42.5222
10000	Revortexed	100	25.5704	100	46.7539	100	28.6921	100	50.1229
