# Supplementary material for: Exceptional stability of a perilipin on lipid droplets depends on its polar residues, suggesting multimeric assembly
Source: eLife journal article supplement (doi:10.7554/elife.61401), 2021-04-15
Supplement: supp [file elife-61401-supp-v1.zip › elife_poa_e61401_Figure_6_source_data_1.xlsx]

## Sheet: Fig. 6C
Data Plin4-4mer mutants, charge and QN series, localization in Hela Cells, experiments Sandra 2017-2018
Mutants M17-M21
Experiment summary
Exp #	0	1	2	3	4	5	6
Exp date	2017-10-12	2017-10-25	2017-10-30	2018-03-14	2018-03-02	2018-03-12	2018-03-21
Plin4-4mer		WT1	WT2	WT3	WT4	WT5	WT6
M17: 2D>E	2D>E0	2D>E1	2D>E2	2D>E3
M18: NN	NN0	NN1	NN2	NN3
M19: QN				QN3	QN4	QN5	QN6
M20: QQ				QQ3	QQ4		QQ6
M21: 3K>R				3K>R3	3K>R4	3K>R5	3K>R6
	No WT cont in Exp 0
	Plin4-4mer
Experiment	1	2	3	4	5	6	0	1	2	3	3	4	5	6	0	1	2	3	3	4	5	6	3	4	5	6
Plin4-4mer	WT	WT	WT	WT	WT	WT	2D>E	2D>E	2D>E	2D>E	3K>R	3K>R	3K>R	3K>R	NN	NN	NN	NN	QN	QN	QN	QN	QQ3	QQ	QQ	QQ
Cell	WT1	WT2	WT3	WT4	WT5	WT6	2D>E0	2D>E1	2D>E2	2D>E3	3K>R3	3K>R4	3K>R5	3K>R6	NN0	NN1	NN2	NN3	QN3	QN4	QN5	QN6	QQ3	QQ4	QQ5	QQ6
1	0.5625	0.448276	0.29	1	0.79	1	0.583333	0.306122	0.53125	0.26087	0.444444	0.230769	0.0952381	0	0	0	0	0	0.153846	0	0	0	0.012987	0.303571	0	0.037037
2	0.466667	0.333333	1	1	0.44	0.47	0.181818	0.642857	0.3	0.833333	0	0.285714	0.03125	0	0.0869565	0	0	0	0	0	0	0	0	0.287671	0	0
3	0.592593	0.766667	1	1	0.69	0.36	0.666667	0.6	0.411765	0	0	0.416667	0	0	0.1	0	0	0	0	0	0	0.048	0	0.1	0	0
4	0.6	0.6	1	1	0.42	0.12	0.529412	0.666667	0.730769	0.0714286	0	0	0	0	0	0	0	0	0	0	0	0	0	0	0	0
5	0.666667	0.583333	0.85	0.4	0.95	0.29	0.5	0.75	0.68	0.388889	0	0	0	0	0	0	0	0	0	0	0	0	0	0	0	0
6	0.923077	1	0.3	1	0.66	1	0.285714	0.642857	0.705882	0.1	0	0	0	0	0	0	0	0	0	0	0	0	0	0	0	0
7	0.916667	0.611111	0	0	0.59	0.32	0.0526316	0.5	0.722222	0.636364	0	0.434783	0	0	0.125	0	0	0	0	0	0	0	0	0	0	0
8	0.375	0.421053	0.82	0.852941	0.61	0.22	0.444444	0.555556	0.533333	0.181818	0	0.372093	0	0	0.285714	0	0	0	0	0	0	0	0	0	0	0
9	0.714286	1	0	0.316667	1	1	0.4375	0.703704	0.64	0.380952	0	0	0	0	0	0	0	0	0	0	0	0	0	0	0	0
10	0.571429	0.534884	0.43	1	1	0.64	0.483871	0.866667	0.347826	0.153846	0.259259	0	0	0.15	0	0	0	0	0	0	0	0	0	0	0	0
11	0.666667	0.8	1	0.555556	1	0.81	0.684211	0.542857	0.347826	0.05	0.444444	0.114286	0	0	0	0	0	0	0	0	0	0	0	0	0	0
12	1	0.4375	0.89	1	1	1	0.47619	0.72	0.433333	0.27027	0.0597015	0	0	0	0.0666667	0	0	0	0	0	0	0	0	0	0	0
13	0.95	0.48	0.45	0.25	0.88	1	0.35	0.533333	0.347826	0.08	0	0	0	0	0	0.0384615	0	0	0	0	0	0	0	0	0	0
14	0.714286	0.466667	1	1	0.73	1	0.545455	0.5	0.642857	0.75	0.0909091	0	0	0	0	0	0	0	0	0	0	0	0	0	0	0
15	0.5	0.588235	1	0.425	0.53	0.8	0.454545	0.45	0.533333	0	0.0434783	0.344828	0	0	0	0	0	0	0	0	0	0	0	0	0	0
16	0.666667	0.391304	1	0.454545	0.44	0.16	0.488372	0.538462	0.4375	0.571429	0.423077	0	0	0	0	0	0.037037	0	0	0	0	0	0	0	0	0
17	0.695652	0.48	1	0.384615	0.54	1	0.483871	0.518519	0.576923	0.384615	0.208333	0	0	0	0	0	0.0869565	0	0	0	0	0	0	0	0	0
18	0.5	0.5	0.22	1	0.21	1	0.52	0.636364	0.571429	0.833333	0.217391		0	0	0	0	0	0	0	0	0	0	0	0	0	0
19	0.466667	0.444444	0.24		0.8	1	0.454545	0.6	0.71875	0.875	0.0769231		0	0	0.147059	0	0	0	0	0	0	0	0	0	0	0
20	0.416667	1	0.92		0.69	0.1	0.4375	0.514286	0.722222	0.4	0.368421		0	0	0	0	0	0	0	0	0	0	0	0	0	0
21	0.5	0.7	1		0.76	1	0.533333	0.588235	0.625	0.354839	0.171429		0	0	0	0	0	0	0	0	0	0	0	0	0	0
22		0.5	0.18		0.77	0.29	0.272727	0.551724	0.5	0.59375	0		0	0.02	0	0	0	0	0	0	0	0	0	0	0	0
23		0.896552	0.69		1	1	0.380952		0.714286	0.529412	0.565217		0	0	0	0	0	0	0	0	0	0	0	0	0	0
24		0.769231	1						0.607143	0.647059	0.0666667		0	0	0	0	0	0	0	0	0	0	0		0	0
25		0.636364	0.48								0.0869565		0	0	0	0.210526	0		0	0	0	0	0		0	0
26			1								0		0	0.14	0	0	0		0	0	0	0	0			0
28			0								0.25		0	0	0	0	0		0	0		0.042	0			0
29			0.62								0.555556		0	0	0	0.1	0		0			0.5				0
30			1								0.3			0		0	0		0			0.087
31											0.0625			0								0.125
32											0.0909091											0
33											0.0666667											0
34											0.166667											0.294
35																						0.182
																						0.086
																						0
																						0
																						0
median	0.6	0.583333	0.85	0.926471	0.73	0.81	0.47619	0.571895	0.574176	0.382784	0.0769231	0	0	0	0	0	0	0	0	0	0	0	0	0	0	0
N	21	25	29	18	23	23	23	22	24	24	33	17	28	30	28	29	29	24	29	27	26	34	27	23	25	28
Experiment	1	2	3	4	5	6	0	1	2	3	3	4	5	6	0	1	2	3	3	4	5	6	3	4	5	6
Plin4-4mer	WT	WT	WT	WT	WT	WT	2D>E	2D>E	2D>E	2D>E	3K>R	3K>R	3K>R	3K>R	NN	NN	NN	NN	QN	QN	QN	QN	QQ3	QQ	QQ	QQ
Cell	WT1	WT2	WT3	WT4	WT5	WT6	2D>E0	2D>E1	2D>E2	2D>E3	3K>R3	3K>R4	3K>R5	3K>R6	NN0	NN1	NN2	NN3	QN3	QN4	QN5	QN6	QQ3	QQ4	QQ5	QQ6

## Sheet: Fig. 6E
Data Plin4-12mer vs csw-12mer, localization in Hela Cells, experiments Sandra 2016
Exp1: 20160607
Exp2: 20160615
Exp3: 20160804
For full data see file 'Resume quant p3x vs M14'
Fraction of LD with Plin4 per cell
	Plin4-12mer			csw-12mer
Cell	WT-Exp1	WT-Exp2	WT-Exp3	csw-Exp1	csw-Exp2	csw-Exp3
1	0.817829	0.84	0.888889	0.522739	0.948879	0.027027
2	0.831539	0.833333	0.925926	0.275805	0.899831	0
3	1.00106	0.789474	0.875	0.172396	0.139324	0
4	0.915222	0.711111	0.934783	0	0.0770357	0.0192308
5	1.0107	1	0.809524	0.0227796	0.274231	0
6	1	0.95	0.842105	0	0.0466527	0
7	0.956697	0.75	0.827586	0.10912	0	0
8	0.904233	0.888455	0.9375	0.170271	0.163773	0
9	0.870133	0.712962	0.933333	0	0.131331	0
10	0.984217	0.95839	0.895833	0.78348	0.236449	0.0434783
11	0.613903	1	0.944444	0.205072	0.207814	0.04
12	0.872419	0.722836	0.944444	0.907963	0.161427	0
13	0.933416	0.69239	0.956522	0.236077	0.0799275	0.0740741
14	1	0.7315	0.857143	0.0591506	0	0
15	0.983732	0.897436	1	0	0	0
16		0.845888	1		0.0974137	0
17			0.846154		0	0
18					0.226734
19					0.0503533
20					0.116009

## Sheet: Fig. 6G
Data Plin4-12mer vs csw-12mer, localization in yeast PET10-GFP + P4-mCh, Manuel 2018
Exp1:	20180123 Dup1
Exp2:	20180123 Dup2
Exp3:	20180209
Signal ratio of Plin4 LD/PM per cell
	Plin4-12mer			csw-12mer
Cell	WT-Exp1	WT-Exp2	WT-Exp3	csw-Exp1	csw-Exp2	csw-Exp3
1	0.43257	0.159	0.641	0.14817	0.194	0.258
2	0.29496	0.188	0.226	0.18159	0.173	0.258
3	0.4464	0.413	0.197	0.13337	0.079	0.105
4	0.23193	0.223	0.37	0.16865	0.157	0.147
5	0.15298	0.393	0.14	0.07803	0.123	0.162
6	0.07811	0.168	0.197	0.14287	0.269	0.218
7	0.29523	0.241	0.275	0.22308	0.125	0.047
8	0.12734	0.244	0.267	0.09728	0.258	0.035
9	0.37598	0.199	0.677	0.20201	0.16	0.09
10	0.18951	0.267	0.331	0.19184	0.336	0.22
11	0.22565	0.281	0.326	0.22938	0.112	0.052
12	0.35188	0.158	0.586	0.11039	0.235	0.14
13	0.445	0.344	0.318	0.48521	0.17	0.122
14	0.17162	0.244	0.201	0.04491	0.08	0.178
15	0.14482	0.194	0.521	0.08855	0.165	0.219
16	0.12574	0.217	0.325	0.08162	0.265	0.109
17	0.33143	0.176	0.513	0.11004	0.197	0.181
18	0.18729	0.331	0.214	0.2197	0.084	0.055
19	0.3016	0.234	0.177	0.05716	0.142	0.188
20	0.38445	0.186	0.083	0.11541	0.193	0.17
21	0.18051	0.296	0.353	0.05697	0.129	0.247
22	0.4742	0.193	0.133	0.11341	0.151	0.127
23	0.05941	0.104	0.171	0.0154	0.113	0.1
24	0.32513	0.104	0.365	0.09744	0.148	0.176
25	0.39993	0.258	0.354	0.12481	0.107	0.27
26		0.316	0.188		0.266	0.12
27		0.181	0.187		0.124	0.105
28		0.132	0.14		0.185	0.166
29		0.243	0.254		0.11	0.162
30		0.178	0.213		0.179	0.164
31		0.279	0.191		0.257	0.096
32		0.167	0.314		0.294	0.193
33		0.131	0.215
34		0.257
median	0.29496	0.22	0.254	0.11541	0.1625	0.162
N	25	34	33	25	32	32

## Sheet: Fig. 6H
FRAP of Plin4-3x-gfp in WT (Erg6-rfp) cells: FRAP PM signal, exponential phase (higher OD)
12/12/07, CSU-X1, 3x frap
		N=5		N=4
verify	WT_mean(5)	WT-SD	M14-mean(4)	M14-SD
-2.5	0.9996	0.00673053	0.99725	0.0136473
-2	1.0036	0.00920869	0.99375	0.00939415
-1.5	0.9994	0.00260768	1.0015	0.0144338
-1	0.9968	0.00438178	1.0015	0.0147986
-0.5	1.0002	0.0111221	1.0065	0.0168622
0	0.2238	0.0417995	0.19575	0.0212818
2	0.235	0.039856	0.212	0.0271784
4	0.2446	0.0385071	0.22025	0.0191551
6	0.2462	0.0375127	0.229	0.0299555
8	0.2508	0.0351667	0.238	0.0286822
10	0.251	0.0355246	0.239	0.0278687
12	0.2592	0.0362243	0.254	0.0422926
14	0.2582	0.0319327	0.2625	0.0436845
16	0.2624	0.0341731	0.267	0.0392768
18	0.266	0.0366538	0.273	0.0389615
20	0.2714	0.0374206	0.278	0.0342442
22	0.2732	0.0324299	0.28075	0.0315951
24	0.2752	0.0327674	0.29125	0.0386383
26	0.2778	0.0308982	0.29575	0.0369899
28	0.2768	0.0304992	0.29875	0.0375888
30	0.2786	0.0296867	0.313	0.0366151
35	0.285	0.0275045	0.33275	0.0427736
40	0.2888	0.0314118	0.33425	0.038474
45	0.2962	0.0298781	0.342	0.0345736
50	0.3014	0.0357883	0.3715	0.0429302
55	0.3062	0.0384148	0.39	0.0405545
60	0.3174	0.031903	0.397	0.0387556
65	0.3198	0.0298865	0.4065	0.0296479
70	0.3242	0.0308415	0.4135	0.0185921
75	0.3334	0.0315801	0.42925	0.0274515
80	0.3364	0.0352605	0.44625	0.0352834
85	0.342	0.0341541	0.47525	0.0341016
90	0.3458	0.0333422	0.49525	0.039424
110	0.349	0.0329621	0.48075	0.0292959
130	0.3616	0.0270148	0.5115	0.010083
150	0.3744	0.0296699	0.537	0.0174547
170	0.392	0.0355949	0.586	0.0462817
190	0.4128	0.0434822	0.6445	0.0725419
210	0.4266	0.0544132	0.66	0.0478679
230	0.4374	0.0515393	0.70375	0.0906362
250	0.4412	0.0364651	0.68125	0.0293414
270	0.4582	0.044718	0.68925	0.0244455
290	0.4712	0.0518189	0.7125	0.0330706
310	0.4716	0.0383836	0.73375	0.0334402
330	0.4974	0.0656415	0.75	0.0702187
350	0.4972	0.0590864	0.764	0.0545833
370	0.5084	0.0679286	0.7785	0.0292859
390	0.5112	0.0601806	0.7745	0.0221736
410	0.5158	0.0595458	0.77925	0.0306309
430	0.523	0.0491782	0.7875	0.0498565
450	0.553	0.0568551	0.78775	0.0604228
470	0.5812	0.0648012	0.79425	0.0475
490	0.5916	0.0827786
