# Supplementary material for: Exceptional stability of a perilipin on lipid droplets depends on its polar residues, suggesting multimeric assembly
Source: eLife journal article supplement (doi:10.7554/elife.61401), 2021-04-15
Supplement: supp [file elife-61401-supp-v1.zip › elife_poa_e61401_Figure_7_source_data_1.xlsx]

## Sheet: Fig. 7B
Maxima Peak and SD by Volume distribution
3h after making the emulsion
	Date	Size radius (nm)	SD	% Intensity of the peak		For plotting in the graph
Plin4 12mer	20200130	150.7	72.92	100		1
Plin4 12mer	20200213	127.5	33.6	100		2
P4M14KD	20200130	335.3	139.2	100		4
P4M14KD	20200213	366.1	172.4	100		5
The size columns shows the maxima peak, and SD shows the polidispersity
		Plin4 12mer		P4M14KD

## Sheet: Fig. 7B-raw data
20200130 Curves of distribution by Volume						20200213 Curves of distribution by intensity
3h after making the Emulsions
	12mer A	M14KD A					12mer B	M14KDB
X Intensity	Record 1: 20203001 Plin4 12mer 0.5mg-ml 100x Dil 1	Record 17: 20203001 P4M14KD 0.5mg-ml 100x Dil 2				X Intensity	Record 1: 20203001 Plin4 12mer 0.5mg-ml 100x Dil 1	Record 17: 20203001 P4M14KD 0.5mg-ml 100x Dil 2
0.4	0	0				0.4	0	0
0.463	0	0				0.463	0	0
0.536	0	0				0.536	0	0
0.621	0	0				0.621	0	0
0.719	0	0				0.719	0	0
0.833	0	0				0.833	0	0
0.965	0	0				0.965	0	0
1.117	0	0				1.117	0	0
1.294	0	0				1.294	0	0
1.499	0	0				1.499	0	0
1.736	0	0				1.736	0	0
2.01	0	0				2.01	0	0
2.328	0	0				2.328	0	0
2.696	0	0				2.696	0	0
3.122	0	0				3.122	0	0
3.615	0	0				3.615	0	0
4.187	0	0				4.187	0	0
4.849	0	0				4.849	0	0
5.615	0	0				5.615	0	0
6.503	0	0				6.503	0	0
7.531	0	0				7.531	0	0
8.721	0	0				8.721	0	0
10.1	0	0				10.1	0	0
11.696	0	0				11.696	0	0
13.545	0	0				13.545	0	0
15.686	0	0				15.686	0	0
18.166	0	0				18.166	0	0
21.037	0	0				21.037	0	0
24.363	0	0				24.363	0	0
28.214	0	0				28.214	0	0
32.674	0	0				32.674	0	0
37.84	0	0				37.84	0	0
43.821	0	0				43.821	0	0
50.749	0	0				50.749	0	0
58.771	0.134	0				58.771	0	0
68.061	0.643	0				68.061	0.175	0
78.82	1.511	0				78.82	0.823	0.009
91.28	2.476	0				91.28	1.928	0.06
105.71	3.346	0.067				105.71	3.204	0.187
122.42	4.082	0.345				122.42	4.43	0.394
141.772	4.784	0.897				141.772	5.602	0.684
164.184	5.718	1.714				164.184	6.994	1.121
190.138	7.001	2.769				190.138	8.714	1.781
220.195	8.381	3.951				220.195	10.396	2.694
255.003	9.609	5.119				255.003	11.64	3.876
295.314	10.567	6.194				295.314	12.212	5.388
341.996	11.143	7.16				341.996	11.907	7.324
396.059	10.789	7.74				396.059	10.233	9.374
458.668	8.948	7.571				458.668	7.037	10.834
531.174	6.129	6.952				531.174	3.484	11.586
615.141	3.316	6.558				615.141	1.073	12.021
712.382	1.213	6.64				712.382	0.147	11.869
824.995	0.209	7.031				824.995	0	10.198
955.41	0	7.445				955.41	0	6.843
1106.44	0	7.556				1106.44	0	3.085
1281.35	0	6.85				1281.35	0	0.672
1483.9	0	4.833				1483.9	0	0
1718.47	0	2.169				1718.47	0	0
1990.13	0	0.44				1990.13	0	0
2304.73	0	0				2304.73	0	0
2669.06	0	0				2669.06	0	0
3090.98	0	0				3090.98	0	0
3579.6	0	0				3579.6	0	0
4145.46	0	0				4145.46	0	0
4800.77	0	0				4800.77	0	0
5559.67	0	0				5559.67	0	0
6438.54	0	0				6438.54	0	0
7456.34	0	0				7456.34	0	0
8635.04	0	0				8635.04	0	0
10000.1	0	0				10000.1	0	0

## Sheet: Fig. 7D
	20190924 P4M14KD
	Before			10min			120min			24 hours			Revortexed
	Image	# particles	per 1000 um^2	Image	# particles	per 1000 um^2	Image	# particles	per 1000 um^2	Image	# particles	per 1000 um^2	Image	# particles	per 1000 um^2
	Image 09 s3	0	0	Image 10 s2 z=4	3677	504.583	Image 07 s3 z=3	1872	256.889	Image 05 z=6	1447	198.567	Image 06 s3 z=6	4957	680.234
	Image 09 s2	0	0	Image 03 z=4	1038	142.442	Image 05 z=2	1112	152.596	Image 04 s3 z=6	1918	263.201	Slide 2 Image 04 z=5	3174	435.558
	Image 05	0	0	Image 01 z=4	1659	227.659	Image 03 z=2	2069	283.922	Image 04 s1 z=6	1927	264.436	Slide 1 Image 04 z=6	2689	369.003
	Image 01	0	0				Image 01 z=3	2851	391.234	Image 01 z=4	4400	603.798	Image 02 s2 z=4	4275	586.645
	Mean	0	0	Mean	2124.67	291.561	Mean	1976	271.16	Mean	2423	332.501	Mean	3773.75	517.86
	StdDev	0	0	StdDev	1379.75	189.339	StdDev	714.513	98.0504	StdDev	1336.93	183.463	StdDev	1030.81	141.455
	SUM (n)	0			6374			7904			9692			15095
	Summary of the frequency obtained in the histogram
			10 min		120min		24h		revortexed
		Fluorescence	Average	StdDev	Average	StdDev	Average	StdDev	Average	StdDev
		0	0	0	0	0	0	0	0	0
		500	0	0	0	0	1.56835	1.79248	1.38419	2.16272
		1000	80.1034	5.16804	76.558	9.44137	70.5165	8.12739	70.8789	5.43725
		1500	17.7188	3.83013	21.3086	9.37445	17.3347	7.80656	15.7595	4.79665
		2000	1.41409	1.65176	1.15243	0.333142	5.47029	1.29529	4.65559	1.25348
		2500	0.181082	0.126389	0.125612	0.103596	3.0152	0.600428	2.11125	0.503011
		3000	0.0612708	0.0345822	0.177868	0.241314	0.907951	0.234955	0.978337	0.360339
		3500	0.122542	0.0691644	0.114649	0.0650896	0.389724	0.0877768	0.671867	0.21621
		4000	0.0583156	0.060373	0.0400197	0.0469108	0.15949	0.137862	0.597627	0.20147
		4500	0.124503	0.107986	0.128416	0.0580339	0.0318032	0.0378982	0.40257	0.106646
		5000	0.0612708	0.0345822	0.101294	0.0576702	0.101218	0.11164	0.424034	0.216715
		5500	0	0	0.0329351	0.0455907	0.0322642	0.0249911	0.382128	0.0607346
		6000	0.0200924	0.0348011	0.0358367	0.0439831	0.0318032	0.0378982	0.317025	0.128973
		6500	0.0522055	0.0486741	0.064186	0.0442454	0.0389815	0.0497062	0.27352	0.116276
		7000	0.0411784	0.0496683	0.0175377	0.0350754	0.0475887	0.0652267	0.125535	0.0370689
		7500	0	0	0.053016	0.0612211	0.00625626	0.0125125	0.144318	0.0347484
		8000	0.032113	0.0556214	0	0	0.0129735	0.0259471	0.120492	0.0315224
		8500	0.00906536	0.0157017	0.0566887	0.0234699	0.0129735	0.0259471	0.176707	0.140333
		9000	0	0	0.00876885	0.0175377	0.00625626	0.0125125	0.115085	0.0939233
		9500	0	0	0	0	0.0538449	0.0601427	0.12218	0.0811571
		10000	0	0	0.0120831	0.0241663	0.0130344	0.0260688	0.0468328	0.0115014
