# Supplementary material for: Exceptional stability of a perilipin on lipid droplets depends on its polar residues, suggesting multimeric assembly
Source: eLife journal article supplement (doi:10.7554/elife.61401), 2021-04-15
Supplement: supp [file elife-61401-supp-v1.zip › elife_poa_e61401_Figure_8_source_data_1.xlsx]

## Sheet: Fig. 8B
20201109 P4 + oil. Samples 1 and Sample 2
	Plin4 + oil Sample 1		Plin4 + oil Sample 2				Sample 1 + Sample 2
Background without fluorescence	Average Fl	Fl - Background no prot	Average Fl	Average Fl - Background no prot			Average Fl - Background no prot
103	2638.6	2535.6	1378	1275			2535.6
	3992.5	3889.5	2144.3	2041.3			3889.5
	2266.4	2163.4	1755.6	1652.6			2163.4
	2266.4	2163.4	1568.78	1465.78			2163.4
	2124.2	2021.2	1491.7	1388.7			2021.2
	2124.2	2021.2	1391.47	1288.47			2021.2
	2124.2	2021.2	1461.8	1358.8			2021.2
	3880.2	3777.2	1406.62	1303.62			3777.2
	3028.4	2925.4	1452.02	1349.02			2925.4
	2140.1	2037.1	1252.34	1149.34			2037.1
	1924.5	1821.5	1317.43	1214.43			1821.5
	2144.5	2041.5	1608.03	1505.03			2041.5
	2179.9	2076.9	1565.73	1462.73			2076.9
	2021	1918	1411.04	1308.04			1918
	3949.3	3846.3	1381.49	1278.49			3846.3
	3766.7	3663.7	1113.42	1010.42			3663.7
	3652.3	3549.3	1026.29	923.285			3549.3
	2401.3	2298.3	1737.47	1634.47			2298.3
	2217.4	2114.4	2190.82	2087.82			2114.4
	2832.6	2729.6	1957.44	1854.44			2729.6
	5880.1	5777.1	2026.7	1923.7			5777.1
	3906.4	3803.4	2058.14	1955.14			3803.4
	3905.5	3802.5	3650.38	3547.38			3802.5
	3650.4	3547.4	2385.82	2282.82			3547.4
	2858.3	2755.3	2693.84	2590.84			2755.3
	3640.9	3537.9	2753.43	2650.43			3537.9
	3331.5	3228.5	2263.82	2160.82			3228.5
	1895.7	1792.7	2887.05	2784.05			1792.7
	1824.3	1721.3	3046.16	2943.16			1721.3
	1645.5	1542.5	2588.88	2485.88			1542.5
	1557.4	1454.4	2559.02	2456.02			1454.4
			1674.32	1571.32			1275
			2867.26	2764.26			2041.3
			3441.36	3338.36			1652.6
			3661.16	3558.16			1465.78
			2228.42	2125.42			1388.7
			2784	2681			1288.47
			2679.98	2576.98			1358.8
			3337.26	3234.26			1303.62
			4797.75	4694.75			1349.02
			2968.93	2865.93			1149.34
			2169.94	2066.94			1214.43
			1982.24	1879.24			1505.03
							1462.73
							1308.04
							1278.49
							1010.42
		Sample 1		Sample 2			923.285		Sample 1 + Sample 2
	Average Fl - Background no prot	2728.31		2085.78			1634.47		Average Fl - Background no prot	2354.95
	SD	982.797		645.505			2087.82		SD	943.521
	SE	176.516		98.4385			1854.44		SE	109.682
	n	31		43			1923.7		n	74
							1955.14
							3547.38
							2282.82
							2590.84
							2650.43
							2160.82
							2784.05
							2943.16
							2485.88
							2456.02
							1571.32
							2764.26
							3338.36
							3558.16
							2125.42
							2681
							2576.98
							3234.26
							4694.75
							2865.93
							2066.94
							1879.24

## Sheet: Fig. 8D
	20201109	50%DiphyPC 50% DiphyPS, Protein mixture centrifuged at 100.000g 4deg for 1h
													Results - Background without protein
	40 nM Plin4 1-5 1xBeads		100 nM Plin4 1-5 1xBeads		100 nM Plin4 1-5 2xBeads		100 nM Plin4 1-5 3xBeads		100 nM Plin4 1-20 1xBeads				40 nM Plin4 1-5 1xBeads	100 nM Plin4 1-5 1xBeads	100 nM Plin4 1-5 2xBeads	100 nM Plin4 1-5 3xBeads	100 nM Plin4 1-20 1xBeads
	Mean	SD	Mean	SD	Mean	SD	Mean	SD	Mean	SD			Mean Fl bead - Background	Mean Fl bead - Background	Mean Fl bead - Background	Mean Fl bead - Background	Mean Fl bead - Background
	555.392	87.6128	1443.3	223.765	443.561	66.112	225.276	56.5207	338.547	88.8455			452.392	1340.3	340.561	122.276	235.547
	610.832	103.931	1672.97	498.549	561.103	66.9409	235.864	58.4151	376.115	59.2359			507.832	1569.97	458.103	132.864	273.115
	773.29	108.501	1020.46	156.601	313.696	54.7057	328.911	100.008	326.514	70.4946			670.29	917.463	210.696	225.911	223.514
	676.64	94.6258	802.294	149.271	424.332	75.6789	242.21	36.088	342.528	62.2386			573.64	699.294	321.332	139.21	239.528
	542.705	110.453	1835.61	258.787	536.603	110.631	337.703	39.4589	441.547	94.2357			439.705	1732.61	433.603	234.703	338.547
	640.528	95.1663	1188.44	234.088	640.359	99.1059	334.238	107.797	299.65	54.2381			537.528	1085.44	537.359	231.238	196.65
	654.263	128.301	1189.57	167.522	516.435	70.2752	199.981	39.6576	239.537	31.9355			551.263	1086.57	413.435	96.9813	136.537
	539.977	94.4175	1532.22	302.754	451.56	64.0053	275.957	37.619	275.323	49.2193			436.977	1429.22	348.56	172.957	172.323
	520.1	63.8633	1165.41	97.8149	451.134	60.2178	234.234	47.5543	265.472	38.3441			417.1	1062.41	348.134	131.234	162.472
	596.411	85.7967	1109.53	221.173	344.019	63.9321	209.266	62.9815	362.206	84.2523			493.411	1006.53	241.019	106.266	259.206
	600.368	104.137	1000.64	119.105	428.248	87.3668	591.871	105.052	370.607	68.5253			497.368	897.64	325.248	488.871	267.607
	605.64	87.0362	1151.97	159.068	477.336	60.6706	187.491	42.0336	394.295	93.412			502.64	1048.97	374.336	84.4907	291.295
	481.636	120.938	1095.93	221.118	346.285	61.7921	298.967	48.1447	370.105	93.8963			378.636	992.933	243.285	195.967	267.105
	530.481	93.9941	1031.18	217.232	447.57	61.6478	280.43	80.2862	323.734	51.4241			427.481	928.182	344.57	177.43	220.734
	495.359	73.509	1321.45	155.738	462.271	74.3919	299.916	62.2872	359.129	46.5054			392.359	1218.45	359.271	196.916	256.129
	642.746	97.3884	1175.59	140.983	481.738	83.284	358.268	58.3971	301.103	48.3643			539.746	1072.59	378.738	255.268	198.103
	701.789	79.3071	1242.99	170.971	557.752	111.533	228.926	39.49	298.935	38.9293			598.789	1139.99	454.752	125.926	195.935
	615.425	102.015	1313.93	226.867	479.57	63.1048	303.799	61.6512	310.575	75.1161			512.425	1210.93	376.57	200.799	207.575
	586.425	89.595	1076.78	147.167	485.813	80.6058	368.813	63.4937	266.818	55.625			483.425	973.78	382.813	265.813	163.818
	512.147	90.4022	1133.58	226.699	421.799	80.5405	310.958	50.7774	268.986	38.9724			409.147	1030.58	318.799	207.958	165.986
Mean	594.108		1225.19		463.559		292.654		326.586			Mean	491.108	1122.19	360.559	189.654	223.586
												SD of Means	74.4589	242.33	77.8107	88.8743	51.3219
	Average of Background without protein
	103

## Sheet: Fig. 8D--%binding
20201117 assay. How much of Plin4 is interacting with the supported bilayers?
Vt for measuring on the plate: 45ul (22.5 ul of buffer and 22.5ul of Sample).
Samples are measured in duplicates (1 and 2)
There are two different solutions of Plin4: P4 A (65 nM) and P4 B(26nM).
There are two types of supported bilayers in beads: 100% DiphyPC (DPC) and 50% DiphyPS 50% DiphyPC (DPS DPC)
There are two samples per supporte bilayer condition: DPC A & DPC B; DPS DPC A & DPS DPC B
There are two numbers of beads used: 1xB that is around 1.5E+06 and 2xB that are 3E+06 beads
Final volume of incubation with beads (50 ul). For that I have added 41 ul of DiphyPLs Beads to 1x, and 82ul to 2x to the tube, then centrifuge and remove all volume but 5ul.
	Measurements				Samples - buffer					DPS DPC 65nM 1xBeads									100% DPC 65nM 1xBeads
Samples	DPC A	DPC B	DPS DPC A	DPS DPC B	DPC A	DPC B	DPS DPC A	DPS DPC B		P4 A sol		After 1x beads		Fl in solution		Prot bound to beads			P4 A sol		After 1x beads		Fl in solution		Prot bound to beads
Buffer 1	1.987	1.337	1.095	0.972	0.77125	0.12125	-0.12075	-0.24375		Average	SD	A	B	A	B	A	B		Average	SD	A	B	A	B	A	B
Buffer 2	1.227	1.135	1.187	0.786	0.01125	-0.08075	-0.02875	-0.42975		3.2905	0.877137	1.03425	1.38025	0.314314	0.419465	0.685686	0.580535		3.8375	0.848744	1.66875	1.68375	0.434853	0.438762	0.565147	0.561238
P4 A sol 1	6.01	5.518	3.578	4.994	4.79425	4.30225	2.36225	3.77825
P4 A sol 2	4.244	4.441	3.981	5.472	3.02825	3.22525	2.76525	4.25625		DPS DPC 65nM 2xBeads									100% DPC 65nM 2xBeads
P4 A after 1xB 1	3.1	2.539	2.286	2.707	1.88425	1.32325	1.07025	1.49125		P4 A sol		After 2x beads		Fl in solution		Prot bound to beads			P4 A sol		After 2x beads		Fl in solution		Prot bound to beads
P4 A after 1xB 2	2.669	3.26	2.214	2.485	1.45325	2.04425	0.99825	1.26925		Average	SD	A	B	A	B	A	B		Average	SD	A	B	A	B	A	B
P4 A after 2xB 1	2.396	2.595	2.117	1.89	1.18025	1.37925	0.90125	0.67425		3.2905	0.877137	0.89925	0.81775	0.273287	0.248518	0.726713	0.751482		3.8375	0.848744	0.95075	1.38025	0.247752	0.359674	0.752248	0.640326
P4 A after 2xB 2	1.937	2.597	2.113	2.177	0.72125	1.38125	0.89725	0.96125
P4 B after sol 1	2.563	2.434	2.158	2.36	1.34725	1.21825	0.94225	1.14425		DPS DPC 26nM 1xBeads									100% DPC 26nM 1xBeads
P4 B after sol 2	2.054	2.038	3.06	2.295	0.83825	0.82225	1.84425	1.07925		P4 B sol		After 1x beads		Fl in solution		Prot bound to beads			P4 B sol		After 1x beads		Fl in solution		Prot bound to beads
P4 B after 1xB 1	1.858	1.739	1.879	2.012	0.64225	0.52325	0.66325	0.79625		Average	SD	A	B	A	B	A	B		Average	SD	A	B	A	B	A	B
P4 B after 1xB 2	1.572	1.827	2.124	1.988	0.35625	0.61125	0.90825	0.77225		1.2525	0.403384	0.78575	0.78425	0.627345	0.626148	0.372655	0.373852		1.0565	0.266586	0.56725	0.56725	0.536914	0.536914	0.463086	0.463086
	Average Buffer	1.21575
	SD	0.353691
