# Supplementary material for: Exceptional stability of a perilipin on lipid droplets depends on its polar residues, suggesting multimeric assembly
Source: eLife journal article supplement (doi:10.7554/elife.61401), 2021-04-15
Supplement: supp [file elife-61401-supp-v1.zip › elife_poa_e61401_Supplementary_file_1.xlsx]

## Sheet: Sheet1
Supplementary File 1. Summary of synthetic gene sequences and protein sequences used in this study.
Name	Construct	protein sequence	DNA sequence
PLin4-4mer	Plin4[246-377]	MSKTVLTGTKDTVCSGVTGAMNVAKGTIQTGVDTSKTVLTGTKDTVCSGVTGAMNVAKGTIQTGVDTSKTVLTGTKDTVCSGVTGAMNVAKGTIQTGVDTtKTVLTGTKnTVCSGVTGAvNlAKeaIQgGlDT	Copic et al., 2018
PLin4-6mer	Plin4[246-443]	MSKTVLTGTKDTVCSGVTGAMNVAKGTIQTGVDTSKTVLTGTKDTVCSGVTGAMNVAKGTIQTGVDTSKTVLTGTKDTVCSGVTGAMNVAKGTIQTGVDTtKTVLTGTKnTVCSGVTGAvNlAKeaIQgGlDT	Copic et al., 2018 (PCR-amplified from Plin4-8mer)
Plin4-8mer	Plin4[246-509]	MSKTVLTGTKDTVCSGVTGAMNVAKGTIQTGVDTSKTVLTGTKDTVCSGVTGAMNVAKGTIQTGVDTSKTVLTGTKDTVCSGVTGAMNVAKGTIQTGVDTTKTVLTGTKNTVCSGVTGAVNLAKEAIQGGLDTTKSMVMGTKDTMSTGLTGAANVAKGAMQTGLNTTQNIATGTKDTVCSGVTGAMNLARGTIQTGVDTTKIVLTGTKDTVCSGVTGAANVAKGAVQGGLDTTKSVLTGTKDAVSTGLTGAVNVAKGTVQTGVDTKD	Copic et al., 2018
Plin4-12mer	Plin4[510-905]	MTKTVLTGTKDTVCSGVTSAVNVAKGAVQGGLDTTKSVVIGTKDTMSTGLTGAANVAKGAVQTGVDTAKTVLTGTKDTVTTGLVGAVNVAKGTVQTGMDTTKTVLTGTKDTIYSGVTSAVNVAKGAVQTGLKTTQNIATGTKNTFGSGVTSAVNVAKGAAQTGVDTAKTVLTGTKDTVTTGLMGAVNVAKGTVQTSVDTTKTVLTGTKDTVCSGVTGAANVAKGAIQGGLDTTKSVLTGTKDAVSTGLTGAVKLAKGTVQTGMDTTKTVLTGTKDAVCSGVTGAANVAKGAVQMGVDTAKTVLTGTKDTVCSGVTGAANVAKGAVQTGLKTTQNIATGTKNTLGSGVTGAAKVAKGAVQGGLDTTKSVLTGTKDAVSTGLTGAVNLAKGTVQTGVDTKD	Copic et al., 2018
Plin4-4T>S	4xM5t	SKTVLTGSKDSVCSGVTGAMNVAKGSIQTGVDSSKTVLTGSKDSVCSGVTGAMNVAKGSIQTGVDSSKTVLTGSKDSVCSGVTGAMNVAKGSIQTGVDSSKTVLTGSKDSVCSGVTGAMNVAKGSIQTGVDS	Copic et al., 2018
Plin4-2D>E	4xM17e	SKTVLTGTKeTVCSGVTGAMNVAKGTIQTGVeTSKTVLTGTKeTVCSGVTGAMNVAKGTIQTGVeTSKTVLTGTKeTVCSGVTGAMNVAKGTIQTGVeTSKTVLTGTKeTVCSGVTGAMNVAKGTIQTGVeT	CTCGAGatgTCTAAGACTGTGCTGACTGGCACGAAAGAGACAGTTTGCAGTGGCGTTACTGGAGCAATGAACGTCGCTAAAGGGACCATCCAAACCGGCGTGGAAACCAGCAAGACCGTCCTCACTGGCACCAAAGAAACCGTATGCTCCGGAGTCACTGGAGCGATGAATGTGGCCAAAGGCACGATTCAGACCGGTGTGGAGACAAGCAAGACCGTACTGACCGGCACAAAGGAGACAGTCTGTTCTGGGGTTACTGGAGCCATGAACGTGGCAAAGGGGACGATCCAGACTGGTGTTGAGACATCCAAGACAGTGCTTACGGGGACAAAGGAGACTGTGTGTTCAGGGGTGACAGGTGCCATGAATGTGGCTAAAGGCACCATACAGACCGGAGTC…
Plin4-3K>R	4xM21r	SrTVLTGTrDTVCSGVTGAMNVArGTIQTGVDTSrTVLTGTrDTVCSGVTGAMNVArGTIQTGVDTSrTVLTGTrDTVCSGVTGAMNVArGTIQTGVDTSrTVLTGTrDTVCSGVTGAMNVArGTIQTGVDT	CTCGAGatgTCTCGCACAGTGCTGACAGGCACTAGGGACACTGTCTGCTCAGGCGTTACCGGTGCCATGAATGTCGCAAGAGGGACAATCCAAACCGGAGTCGATACGTCCAGGACCGTACTCACGGGTACACGCGACACTGTTTGCTCTGGCGTGACAGGTGCGATGAACGTAGCCAGAGGCACCATACAGACAGGGGTGGATACCAGCCGAACAGTGCTTACCGGGACTCGGGATACCGTTTGTAGCGGCGTTACTGGCGCTATGAACGTGGCACGTGGCACTATCCAGACTGGAGTCGACACGAGTCGGACAGTCCTGACTGGAACGAGGGATACCGTGTGTTCCGGAGTGACAGGGGCCATGAATGTGGCTAGAGGGACCATTCAGACCGGAGTG…
Plin4-NN	4xM18q	SKTVLTGTKDTVCSGVTGAMNVAKGTInTGVDTSKTVLTGTKDTVCSGVTGAMNVAKGTInTGVDTSKTVLTGTKDTVCSGVTGAMNVAKGTInTGVDTSKTVLTGTKDTVCSGVTGAMNVAKGTInTGVDT	CTCGAGatgTCAAAGACAGTCCTTACCGGCACAAAAGACACCGTGTGTTCTGGGGTTACAGGGGCAATGAACGTGGCAAAAGGGACCATAAACACAGGGGTGGATACTTCCAAAACCGTGCTGACTGGCACGAAGGACACAGTCTGCAGTGGCGTTACAGGAGCGATGAATGTCGCCAAAGGGACGATCAACACTGGAGTTGACACCTCCAAGACTGTGCTCACTGGAACCAAGGACACAGTGTGCTCTGGTGTGACTGGTGCCATGAATGTCGCTAAGGGCACCATCAATACCGGAGTCGATACGAGCAAGACTGTTCTGACAGGCACCAAGGATACCGTGTGTAGCGGTGTAACAGGCGCTATGAATGTAGCCAAAGGCACCATTAACACTGGAGTG…
Plin4-QN	4xM19qn	SKTVLTGTKDTVCSGVTGAMqVAKGTInTGVDTSKTVLTGTKDTVCSGVTGAMqVAKGTInTGVDTSKTVLTGTKDTVCSGVTGAMqVAKGTInTGVDTSKTVLTGTKDTVCSGVTGAMqVAKGTInTGVDT	CTC GAG ATG TCT AAG ACA GTG CTG ACT GGA ACC AAG GAT ACC GTC TGT AGT GGG GTA ACT GGT GCC ATG CAA GTG GCC AAA GGG ACG ATC AAT ACA GGC GTG GAT ACA TCC AAG ACC GTT CTT ACC GGC ACT AAG GAT ACC ATG TGC TCA GGG GTT ACA GGT GCT GTC CAG GTT GCG AAA GGC ACG ATT AAC ACA GGA GTG GAT ACC AGC AAG ACA ATG CTG ACG GGG ACA AAG GAC ACG GTG TGT AGC GGT GTG ACT GGC GCT GTA CAG GTG GCA AAA GGG ACC ATA AAT ACC GGA GTG…
Plin4-QQ	4xM20q2	SKTVLTGTKDTVCSGVTGAMqVAKGTIqTGVDTSKTVLTGTKDTVCSGVTGAMqVAKGTIqTGVDTSKTVLTGTKDTVCSGVTGAMqVAKGTIqTGVDTSKTVLTGTKDTVCSGVTGAMqVAKGTIqTGVDT	CTC GAG atg TCT AAG ACC GTC CTT ACA GGG ACT AAG GAC ACC GTG TGT TCC GGA GTT ACG GGA GCA ATG CAA GTC GCC AAA GGC ACC ATA CAG ACT GGC GTG GAC ACT TCC AAG ACC GTG CTC ACA GGC ACC AAG GAC ACA ATG TGC TCA GGA GTG ACT GGC GCT GTT CAG GTC GCC AAA GGG ACG ATC CAG ACA GGA GTC GAT ACC AGC AAG ACA ATG CTG ACT GGC ACG AAG GAT ACC GTG TGT TCT GGC GTT ACA GGG GCA GTA CAG GTA GCG AAA GGG ACA ATC CAG ACA GGT GTT…
csw-12mer (charge swap)	P4-M14kd	TKDKLTGTVTTVCNVVTSAGSVAKDLVQGGAGTTKSVVIGTTDKMSTGLTGAVNAAKGAVQTGTDVAKTVLTGTTDKVTTGLVGAVNVAKGTVQTGTDMTKTVLTGTTDKIYSGVTSAVNVAKGAVQTGTKLTGNIATQTKNTFSSGVTGAVNVATGAAQKGVDTAKTVLTGTTDKVTTGLMGAVNVAKGTVQTSTDVTKDKLTGTVTTVCNAVTGAGSVAKDLIQGGAGTTKSVLTGTADKVSTGLTGALKVAKGTVQTGTDMTKTVLTGTADKVCSGVTGAVNAAKGAVQMGTDVAKTVLTGTTDKVCSGVTGAVNAAKGAVQTGTKLTQNIATGTTNKLGSGVTGAVKAAKGAVQGGTDLTKSVLTGTADKVSTGLTGALNVAKGTVQTGTDV	CTCGAGATGACCAAGGATAAGCTGACCGGCACCGTGACTACGGTGTGCAATGTGGTCACAAGTGCCGGTTCCGTTGCTAAAGACCTCGTGCAAGGCGGGGCAGGCACCACCAAGTCCGTCGTGATTGGAACTACAGACAAGATGAGTACAGGGCTTACTGGGGCTGTCAATGCCGCGAAAGGTGCAGTCCAAACGGGCACTGATGTGGCTAAGACCGTACTGACCGGTACCACCGACAAAGTGACAACCGGTCTGGTCGGCGCAGTGAACGTAGCGAAAGGAACAGTTCAGACTGGAACAGATATGACCAAAACGGTGCTGACCGGCACCACCGACAAGATCTACTCCGGTGTGACATCTGCCGTGAATGTCGCTAAAGGCGCTGTACAGACTGGCACA…
Plin1 AH	human Plin1 aa109-194	MPPEKIASELKDTISTRLRSARNSISVPIASTSDKVLGAALAGCELAWGVARDTAEFAANTRAGRLASGGADLALGSIEKVVEYLLPP	corresponding human Plin1 cDNA
Plin2 AH	human Plin2 aa100-192	PSTQIVANAKGAVTGAKDAVTTTVTGAKDSVASTITGVMDKTKGAVTGSVEKTKSVVSGSINTVLGSRMMQLVSSGVENALTKSELLVEQYLP	corresponding human Plin2 cDNA
Plin3 AH (1)	human Plin3 aa113-205	mascPTEKVLADTKELVSSKVSGAQEMVSSAKDTVATQLSEAVDATRGAVQSGVDKTKSVVTGGVQSVMGSRLGQMVLSGVDTVLGKSEEWADNHLP	corresponding human Plin3 cDNA
Plin3(87-205)	human Plin3 aa87-205	PQIASASEYAHRGLDKLEENLPILQQPTEKVLADTKELVSSKVSGAQEMVSSAKDTVATQLSEAVDATRGAVQSGVDKTKSVVTGGVQSVMGSRLGQMVLSGVDTVLGKSEEWADNHLP	corresponding human Plin3 cDNA
(1) The additional sequence 'masc' (in italic) was introduced during cloning into the bacterial expression vector
