# Supplementary figures and images for: Exceptional stability of a perilipin on lipid droplets depends on its polar residues, suggesting multimeric assembly
Source: eLife journal article supplement (doi:10.7554/elife.61401), 2021-04-15

Figure 6 - Supplement 1

**A**

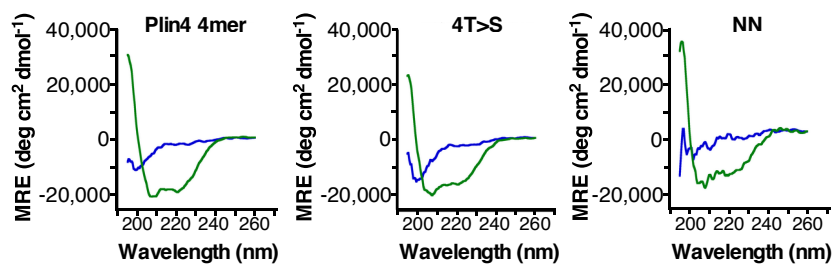

**B**

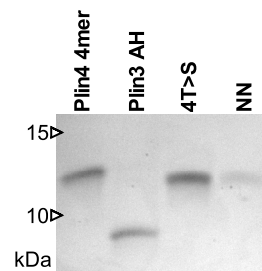

Supplement: supp [file elife-61401-supp-v1.zip]

**Figure 4 - Supplement 1**

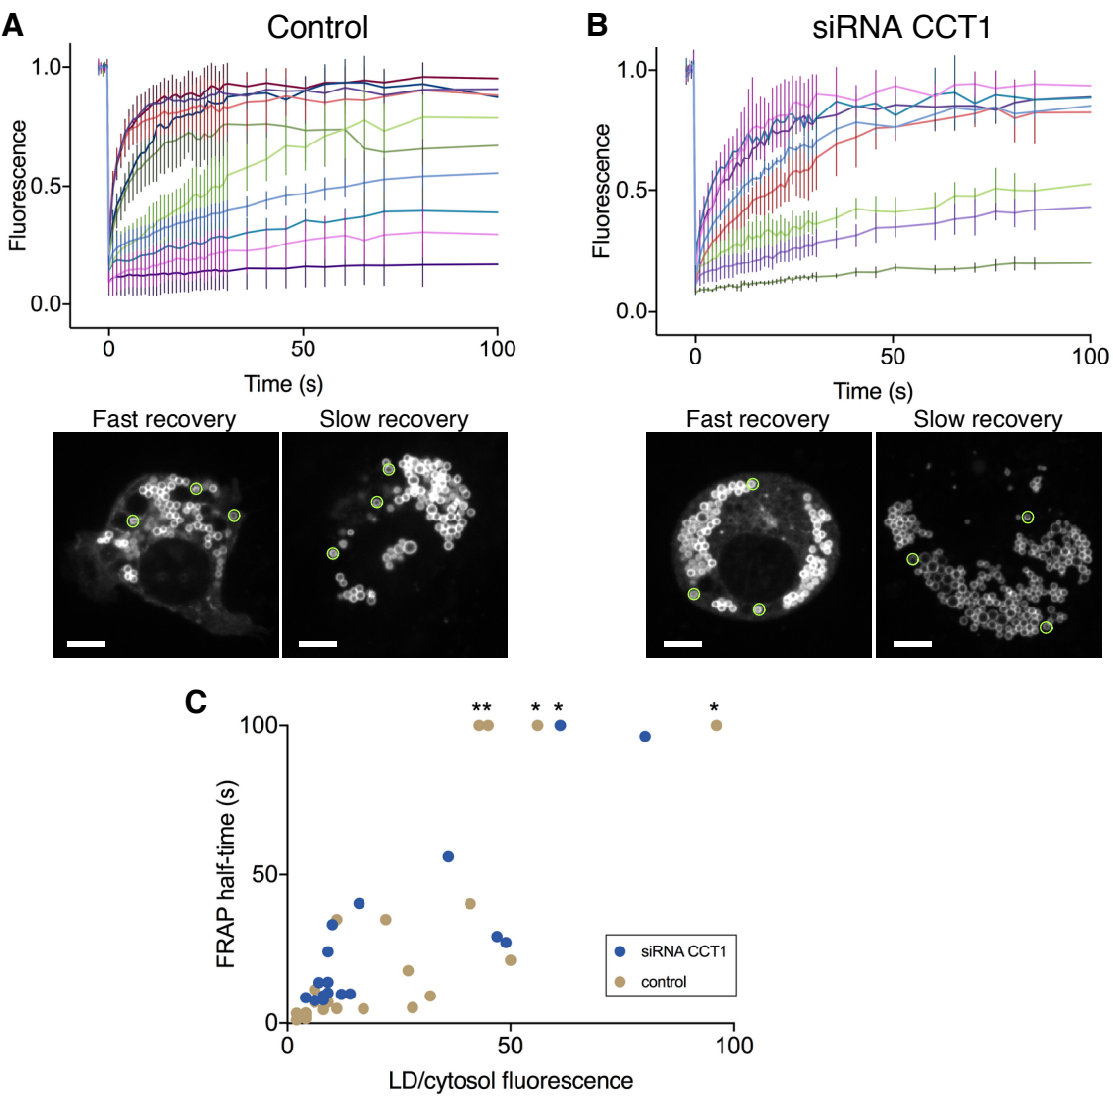

Supplement: supp [file elife-61401-supp-v1.zip]

Figure 6 - Supplement 2

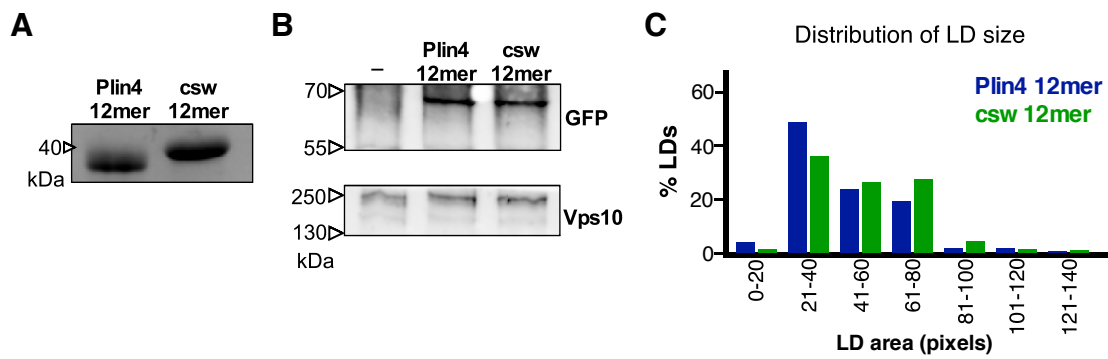

Supplement: supp [file elife-61401-supp-v1.zip]

**Figure 5 - Supplement 1**

**A**

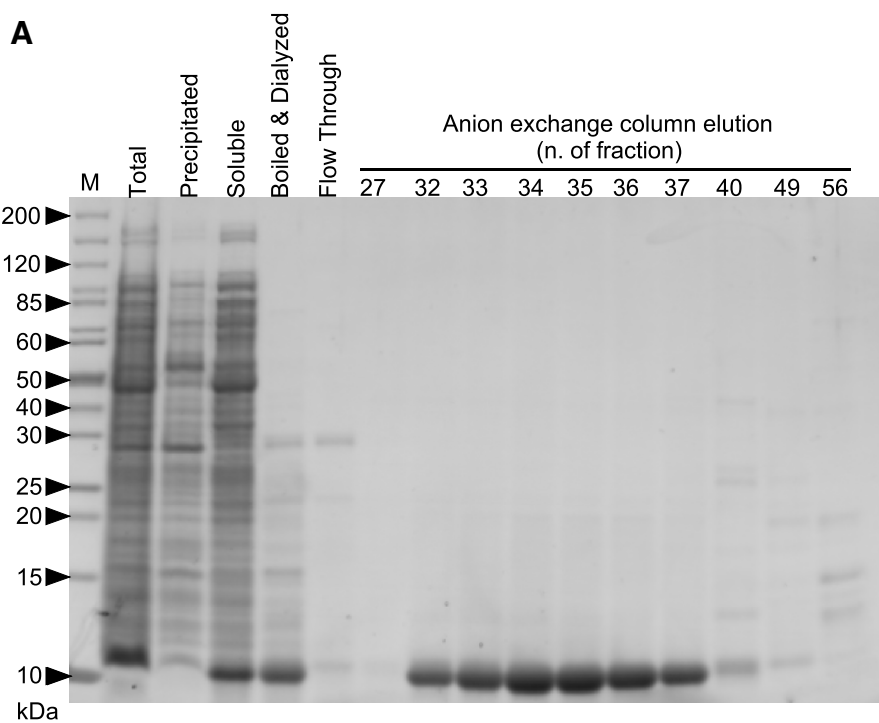

**B**

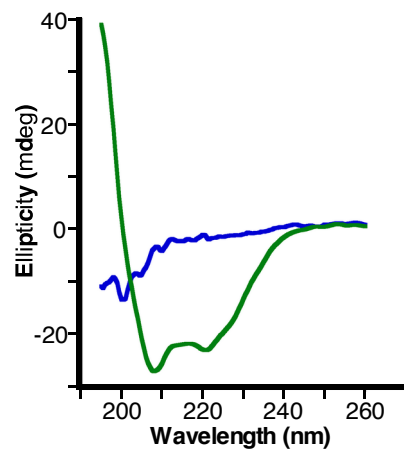

Supplement: supp [file elife-61401-supp-v1.zip]

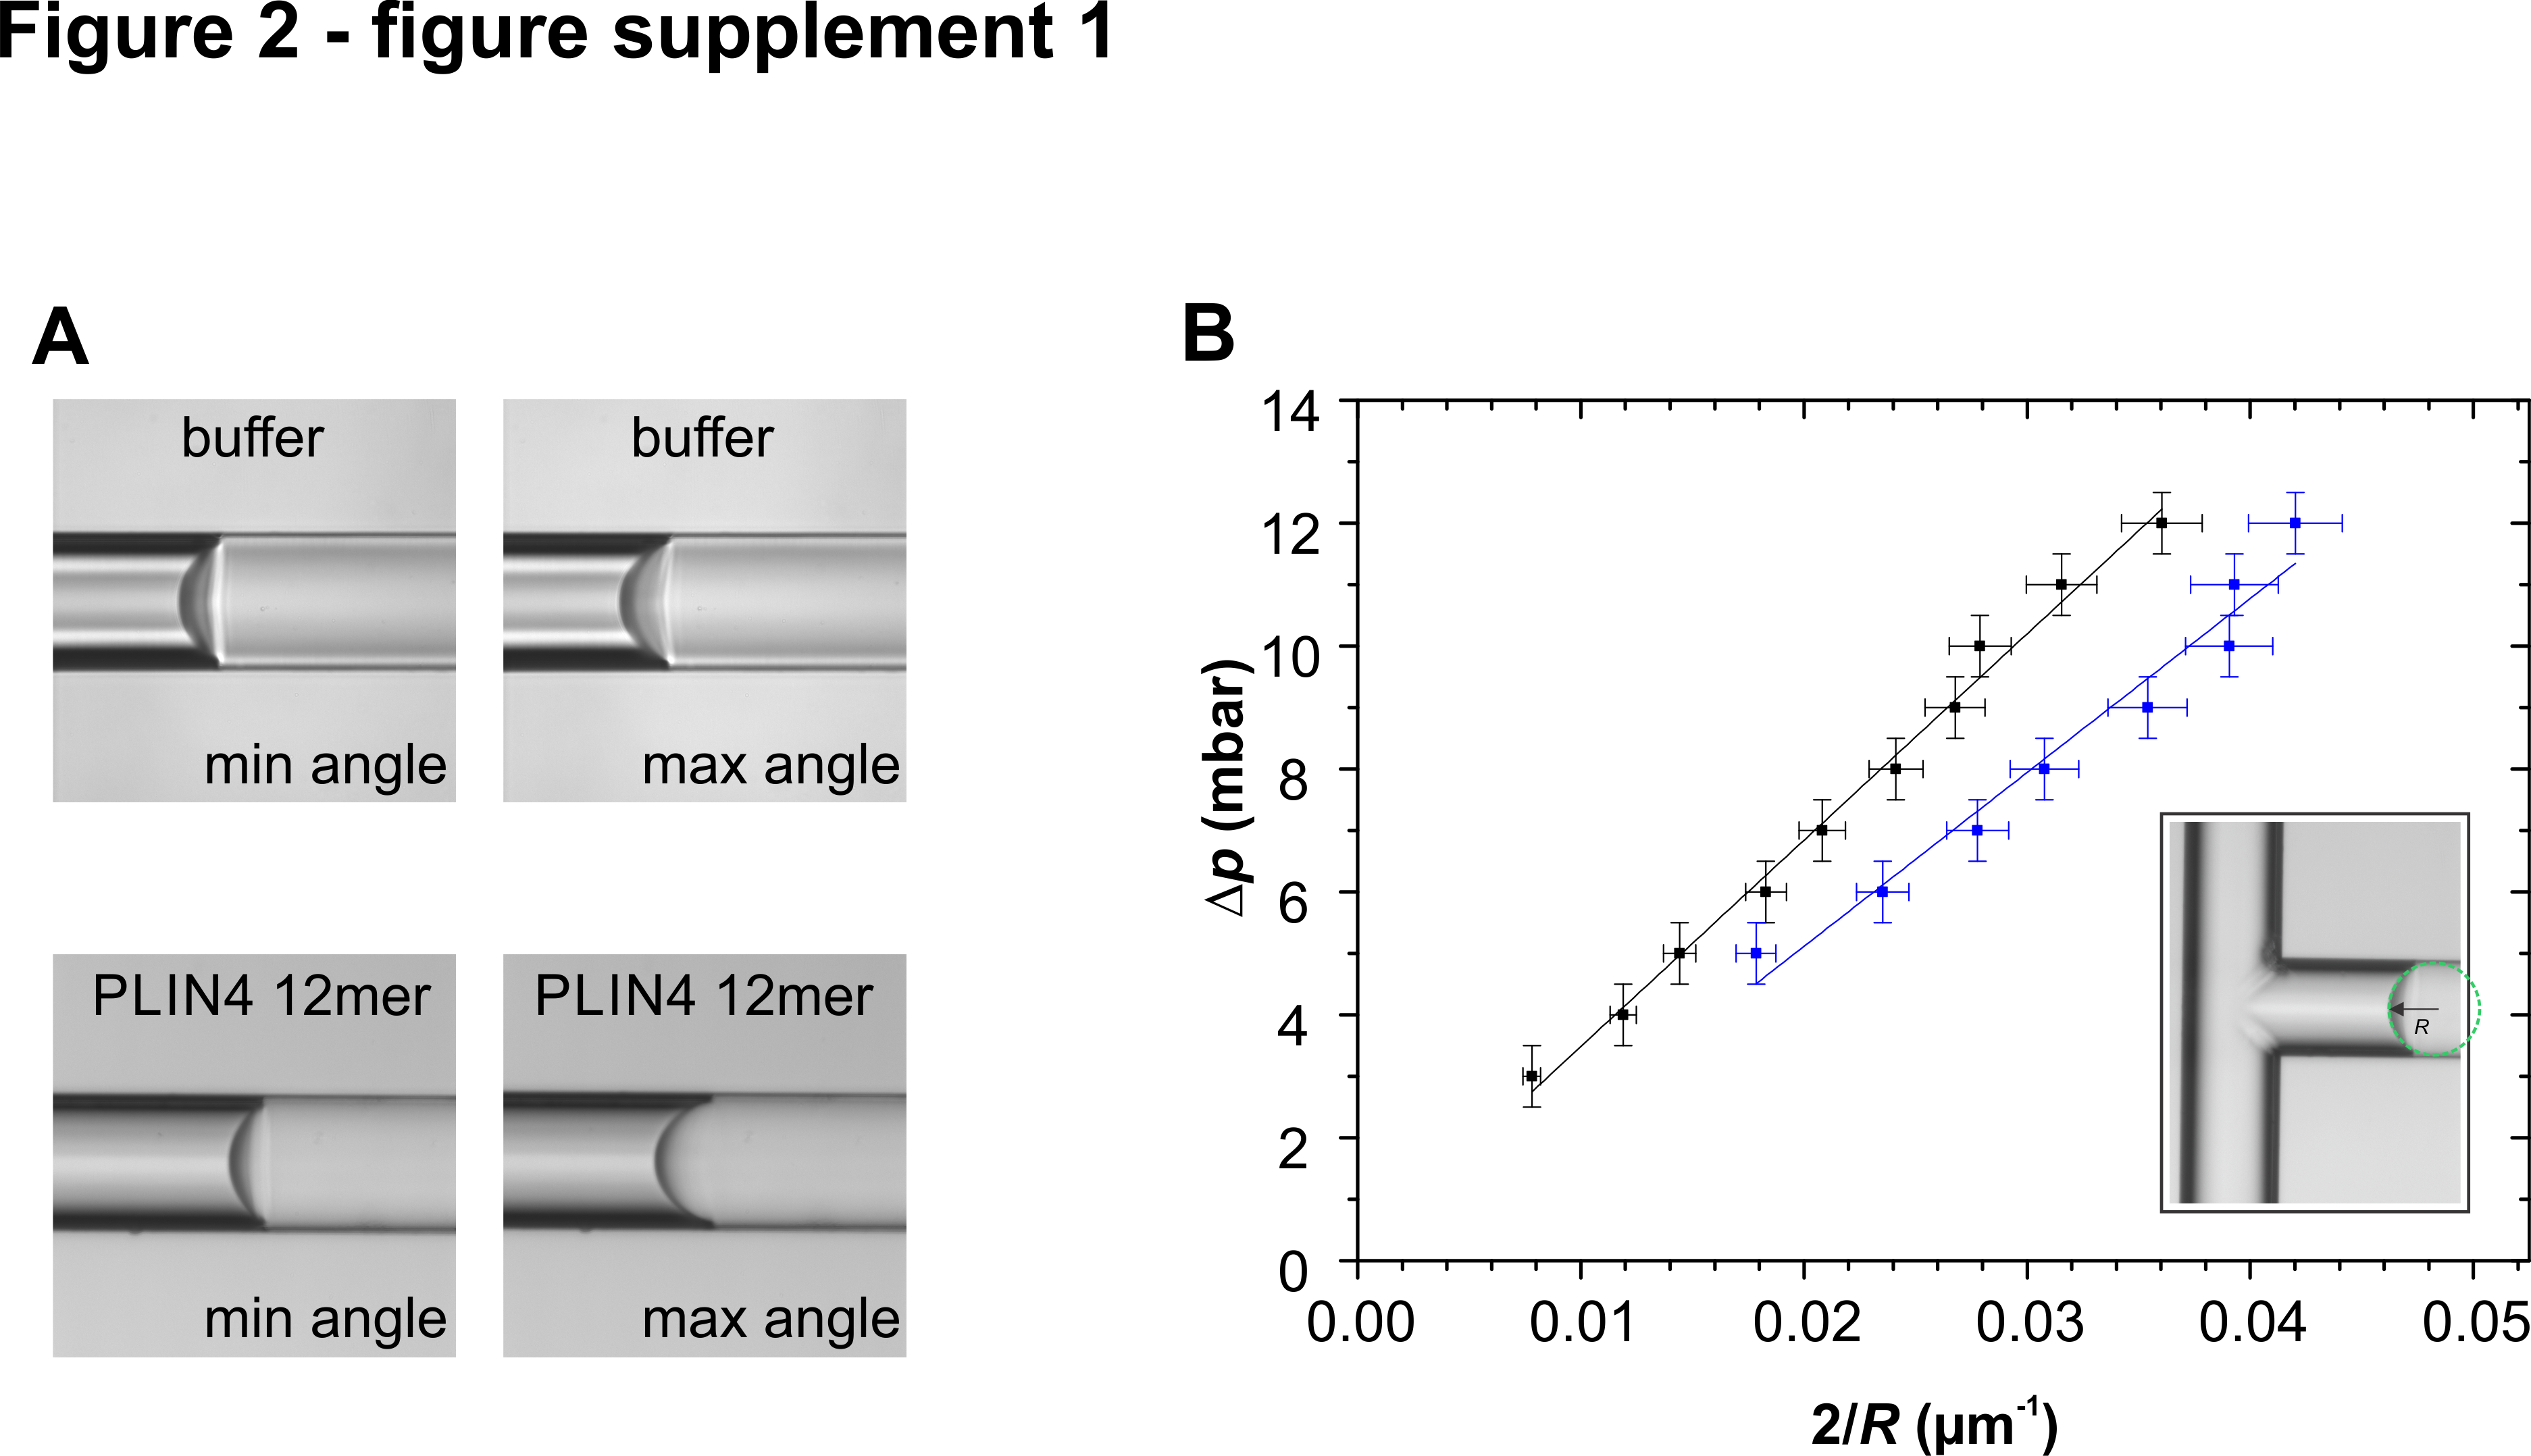

Supplement: supp [file elife-61401-supp-v1.zip › elife_poa_e61401_Figure_2_figure_suplement_1.png]

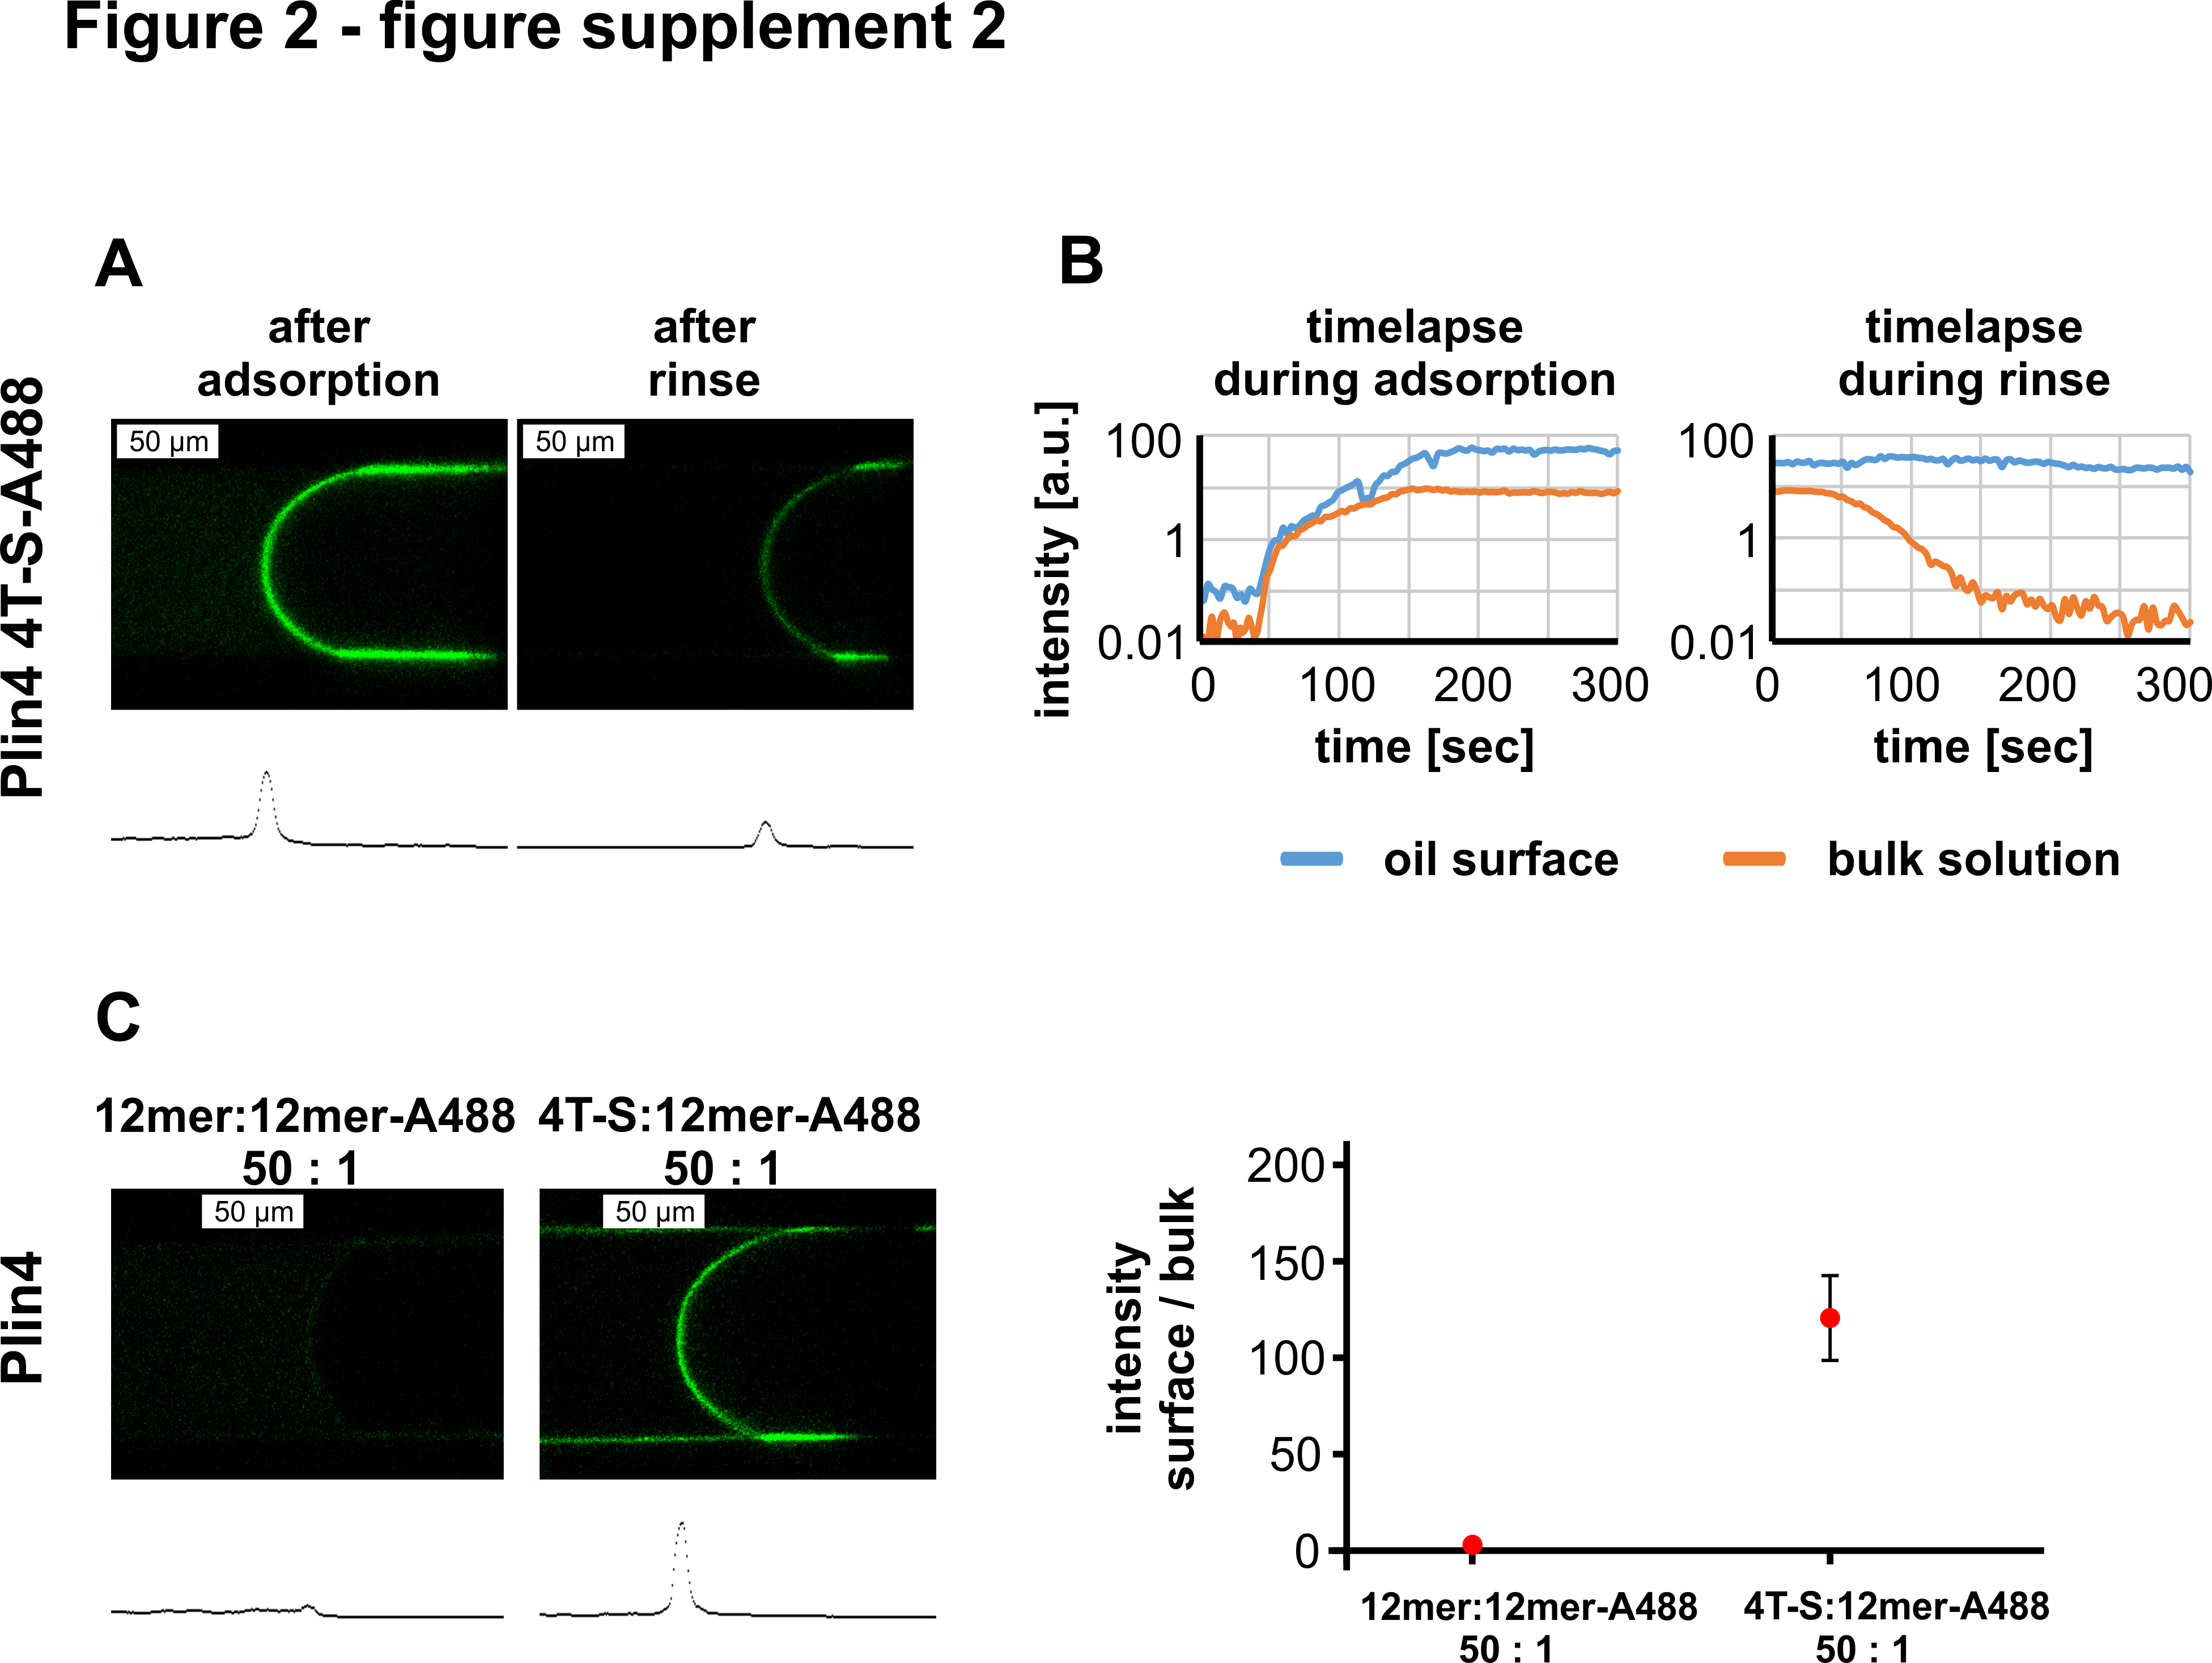

Supplement: supp [file elife-61401-supp-v1.zip › elife_poa_e61401_Figure_2_figure_supplement_2.png]

Figure 3 - Supplement 1

**A**

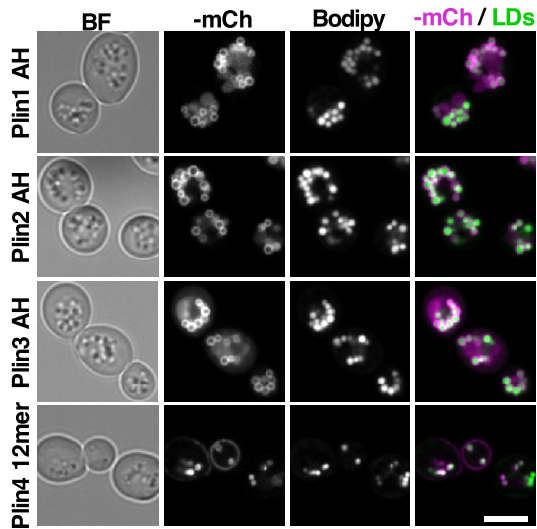

**B**

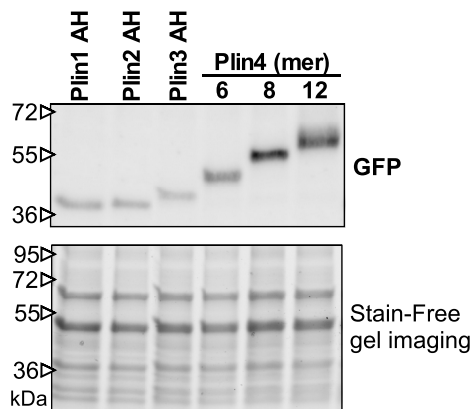

Supplement: supp [file elife-61401-supp-v1.zip › elife_poa_e61401_Figure_3_figure_supplement_1.pdf]
